# Supplementary material for: IDH2-mediated regulation of the biogenesis of the oxidative phosphorylation system
Source: PubMed Central journal article supplement (PMC9094667; doi:10.1126/sciadv.abl8716), 2022-05-11

Supplementary Materials for  
**IDH2-mediated regulation of the biogenesis of the oxidative phosphorylation system**

Anjaneyulu Murari, Naga S. V. Goparaju, Shauna-Kay Rhooms, Kaniz F. B. Hossain, Felix G. Liang, Christian J. Garcia, Cindy Osei, Tong Liu, Hong Li, Richard N. Kitsis, Rajesh Patel, Edward Owusu-Ansah\*

\*Corresponding author. Email: eo2364@cumc.columbia.edu

Published 11 May 2022, *Sci. Adv.* **8**, eabl8716 (2022)

DOI: 10.1126/sciadv.abl8716

**The PDF file includes:**

Figs. S1 to S18

Legends for tables S1 to S8

**Other Supplementary Material for this manuscript includes the following:**

Tables S1 to S8

### **Figure S1: Replicates of immunoblots shown in Figures 1E-1G**

The figure legend is the same as what is described for figure panels 1E-1G.

### **Figure S2: Additional replicates of immunoblots shown in Figures 1E-1G**

The figure legend is the same as what is described for figure panels 1E-1G.

### **Figure S3: Quantification of immunoblots shown in Figures 1E-1G**

The antibodies quantified for 1E-1G are listed above each graph. In all instances except the 1F panels, p values are based on one-way ANOVAs followed by the Dunnett's test. In the 1F panels, p values are based on the student's t-test for unpaired two-tailed samples. The fold change shown refers to the mean  $\pm$  s.e.m (standard error of the mean); and n.s. denotes  $p > 0.05$ , \* =  $p < 0.05$ , \*\* =  $p < 0.01$  and \*\*\* =  $p < 0.001$ . The number of replicates (n) = 3 biological replicates, with 15 flies per replicate.

### **Figure S4: NADPH or ferroptosis inhibitors fail to rescue the OXPHOS assembly defects observed when dIDH2 is knocked down.**

(A-F) Mitochondrial preparations from thoraces isolated from Dmef2-Gal4/w1118 (wild type) and dIDH2-KD1 flies raised on a diet supplemented with 5mM and 10mM NADPH 4 days after eclosure. The mitochondrial preparations were analyzed by BN-PAGE, followed by immunoblotting with the antibodies indicated. The blots were imaged following a short exposure to detect the holoenzyme and supercomplexes, after which the region corresponding to the holoenzyme and supercomplexes was cut off, and the rest of the blot re-imaged after a longer exposure to detect the assembly intermediates (denoted as \*). The # refers to the initiating AI of the Q-module. The antibodies used were anti-NDUFS3 which detects dNDUFS3 (A), anti-dNDUFS7 (B), anti-dNDUFS8 (C), anti-dNDUFA9 (D), anti-dND1 (E), and anti-dND3 (F). Anti-ATP synthase, subunit B (ATP5F1B) which detects the *Drosophila* ortholog, dATP-Syn $\beta$ , was used as a loading control.

(G-J) Mitochondrial preparations from thoraces isolated from Dmef2-Gal4/w1118 (wild type) and dIDH2-KD2 flies raised on a diet supplemented with 1mg/ml each of ferrostatin-1 and liproxstatin-1 (FL-1) 4 days after eclosure. The antibodies used were anti-NDUFS3 which detects dNDUFS3

(G), anti-dNDUFA9 (H), anti-dNDUFV3 (I) and anti-dNDUFB5 (J). Anti-ATP synthase, subunit B (ATP5F1B) which detects the *Drosophila* ortholog, dATP-Syn $\beta$ , was used as a loading control.

**Figure S5: Replicates of immunoblots shown in Figure 4**

The figure legend is the same as what is described for Figure 4.

**Figure S6: Additional replicates of immunoblots shown in Figure 4**

The figure legend is the same as what is described for Figure 4.

**Figure S7: Quantification of immunoblots shown in Figure 4**

The antibody quantified for each figure panel is listed above each graph. In all instances, p values are based on one-way ANOVAs followed by the Dunnett's test. The fold change shown refers to the mean  $\pm$  s.e.m (standard error of the mean); and n.s. denotes  $p > 0.05$ , \* =  $p < 0.05$ , \*\* =  $p < 0.01$  and \*\*\* =  $p < 0.001$ . The number of replicates (n) = 3 biological replicates, with 40 flies per replicate.

**Figure S8: Replicates of immunoblots shown in Figure 5**

The figure legend is the same as what is described for Figure 5.

**Figure S9: Additional replicates of immunoblots shown in Figure 5**

The figure legend is the same as what is described for Figure 5.

**Figure S10: Quantification of immunoblots shown in Figure 5**

The antibody quantified for each figure panel is listed above each graph. In all instances, p values are based on one-way ANOVAs followed by the Dunnett's test. The fold change shown refers to the mean  $\pm$  s.e.m (standard error of the mean); and n.s. denotes  $p > 0.05$ , \* =  $p < 0.05$ , \*\* =  $p < 0.01$  and \*\*\* =  $p < 0.001$ . The number of replicates (n) = 3 biological replicates, with 40 flies per replicate.

**Figure S11: Replicates of immunoblots shown in Figure 8**

The figure legend is the same as what is described for Figure 8.

### **Figure S12: Additional replicates of immunoblots shown in Figure 8**

The figure legend is the same as what is described for Figure 8.

### **Figure S13: Quantification of immunoblots shown in Figures 8A-8C**

The antibodies quantified for figure panels are listed above each graph. In 8C, p values are based on one-way ANOVAs followed by Dunnett's multiple comparisons test. In 8A and 8B, one-way ANOVAs followed by Tukey's multiple comparisons test was used. The fold change shown refers to the mean  $\pm$  s.e.m (standard error of the mean); and n.s. denotes  $p > 0.05$ , \* =  $p < 0.05$ , \*\* =  $p < 0.01$  and \*\*\* =  $p < 0.001$ . The number of replicates (n) = 3 biological replicates, with 15 flies per replicate.

### **Figure S14: Quantification of immunoblots shown in Figures 8D and 8E**

The antibodies quantified for the figure panels are listed above each graph. Due to recurrent phosphorylation-dephosphorylation oscillations, we quantified each kinase experiment separately in Figure 8D. The p values in 8E are based on one-way ANOVAs followed by Dunnett's multiple comparisons test. The fold change shown refers to the mean  $\pm$  s.e.m (standard error of the mean); and n.s. denotes  $p > 0.05$ , \* =  $p < 0.05$ , \*\* =  $p < 0.01$  and \*\*\* =  $p < 0.001$ . The number of replicates (n) = 3 biological replicates, with 15 flies per replicate.

### **Figure S15: Quantification of immunoblots shown in Figure 8F**

The antibody quantified for each figure panel is listed above each graph. Due to recurrent phosphorylation-dephosphorylation oscillations, we quantified each kinase experiment separately. For HSP60 and cytochrome C, one-way ANOVAs followed by Tukey's multiple comparisons test was used. The fold change shown refers to the mean  $\pm$  s.e.m (standard error of the mean); and n.s. denotes  $p > 0.05$ , \* =  $p < 0.05$ , \*\* =  $p < 0.01$  and \*\*\* =  $p < 0.001$ . The number of replicates (n) = 3 biological replicates, with 15 flies per replicate.

### **Figure S16: Replicates of immunoblots shown in Figure 9**

The figure legend is the same as what is described for Figure 9.

### **Figure S17: Additional replicates of immunoblots shown in Figure 9**

The figure legend is the same as what is described for Figure 9.

**Figure S18: Quantification of immunoblots shown in Figure 9**

The antibodies quantified for the figure panels are listed above each graph. In all instances, p values are based on the student's t-test for unpaired two-tailed samples. The fold change shown refers to the mean  $\pm$  s.e.m (standard error of the mean); and n.s. denotes  $p > 0.05$ , \* =  $p < 0.05$ , \*\* =  $p < 0.01$  and \*\*\* =  $p < 0.001$ . The number of replicates (n) = 3 biological replicates, with 40 flies per replicate.

**Table S1: Comparison of identified proteins and their relative quantitation among four A samples using the spectra counting method (sorted by protein name)**

**Table S2: Comparison of identified proteins and their relative quantitation among four B samples using the spectra counting method (sorted by protein name)**

**Table S3: Comparison of identified proteins and their relative quantitation among four C samples using the spectra counting method (sorted by protein name)**

**Table S4: Comparison of identified proteins and their relative quantitation among four D samples using the spectra counting method (sorted by protein name)**

**Table S5: Comparison of identified proteins and their relative quantitation among four E samples using the spectra counting method (sorted by protein name)**

**Table S6: Comparison of identified proteins and their relative quantitation among four F samples using the spectra counting method (sorted by protein name)**

**Table S7: RNA-seq profile when dIDH2 is disrupted in flight muscles**

**Table S8: A list of the peptide antigens and their target proteins.**

# FIGURE S1

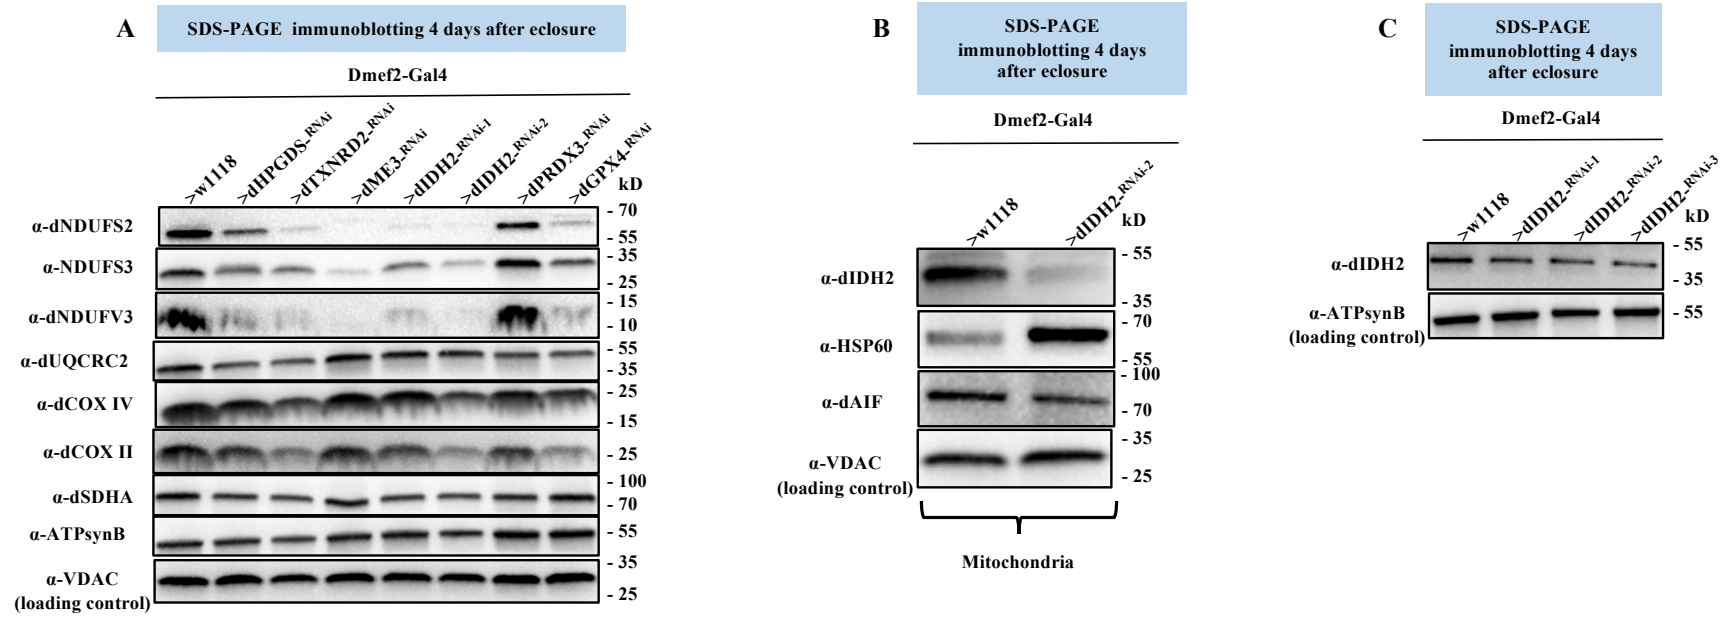

# FIGURE S2

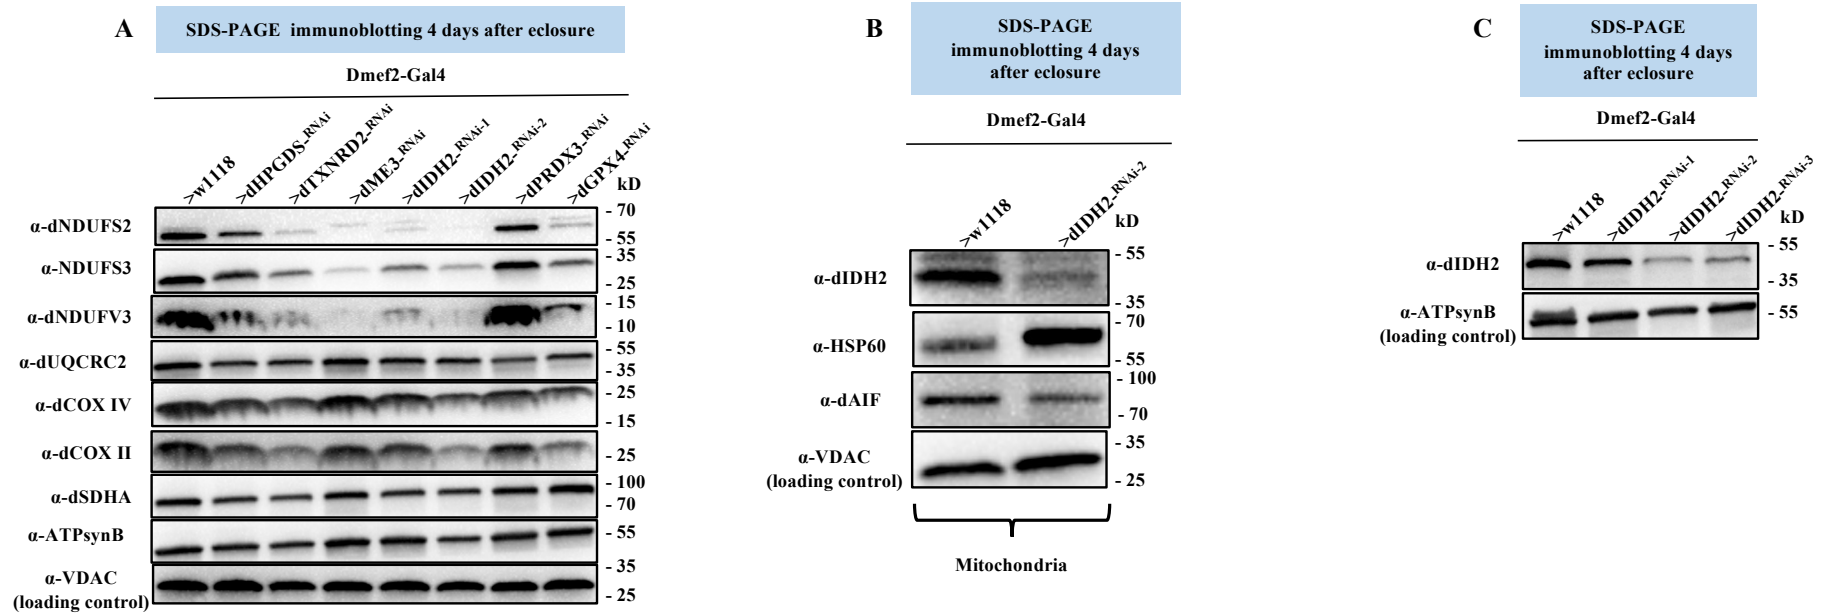

# FIGURE S3

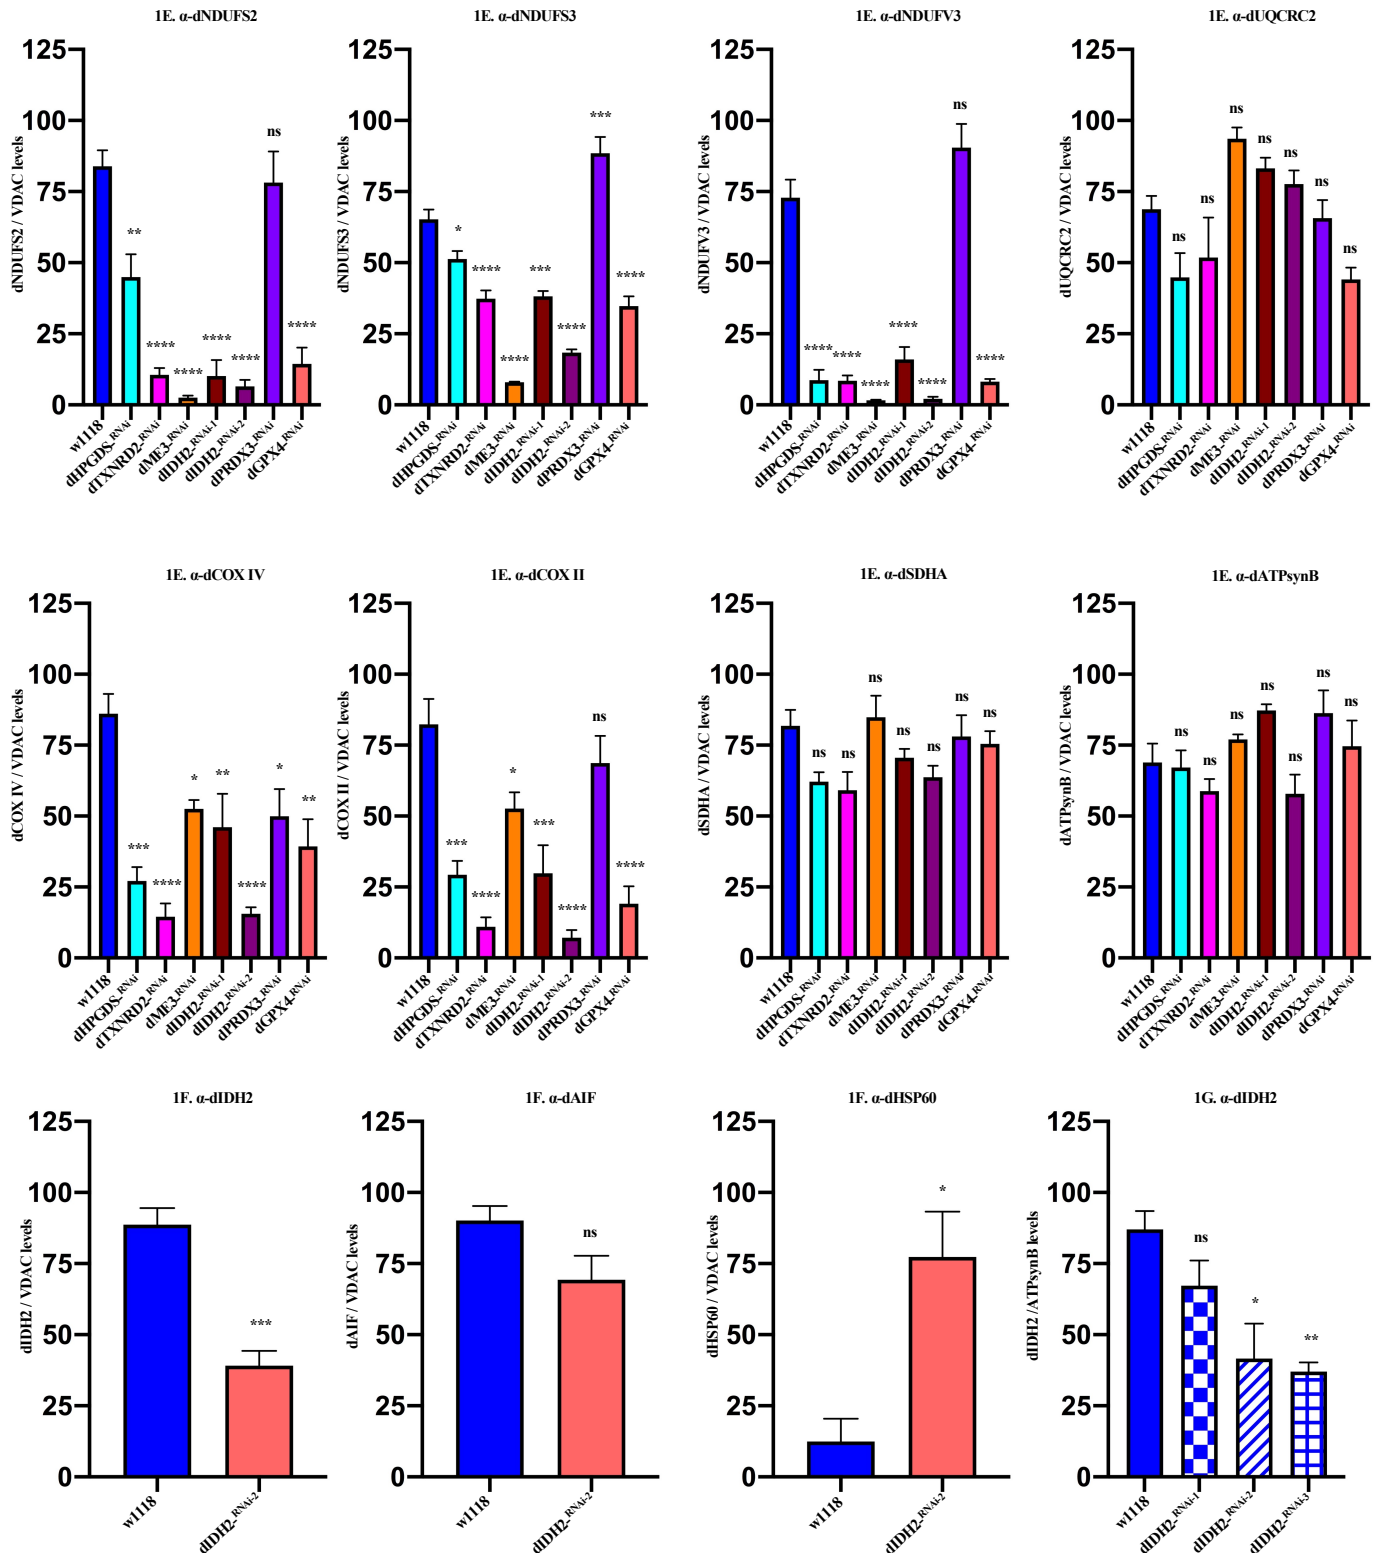



# FIGURE S4

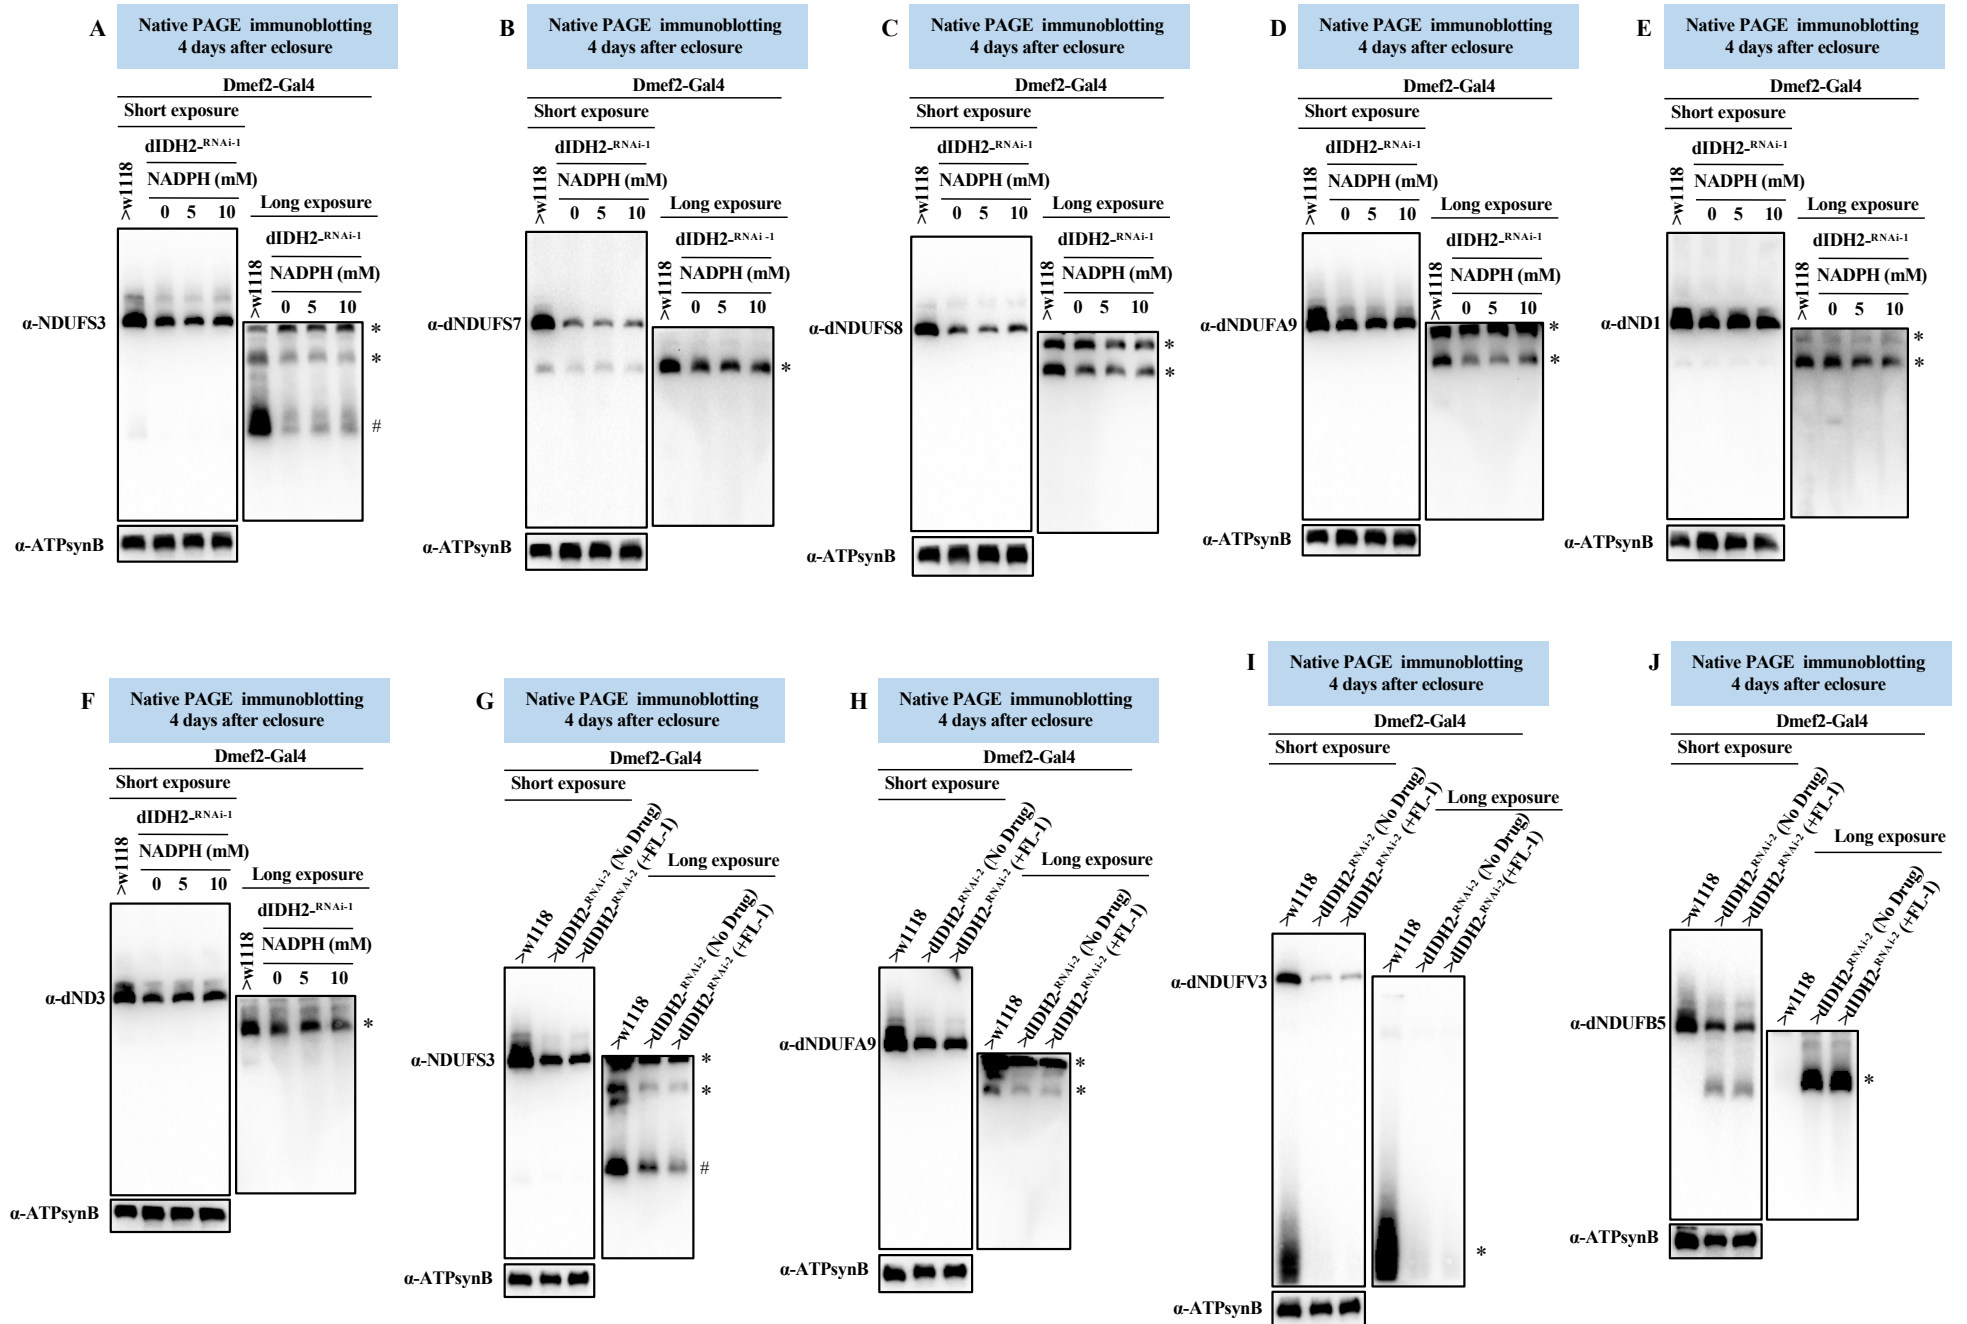

# FIGURE S5

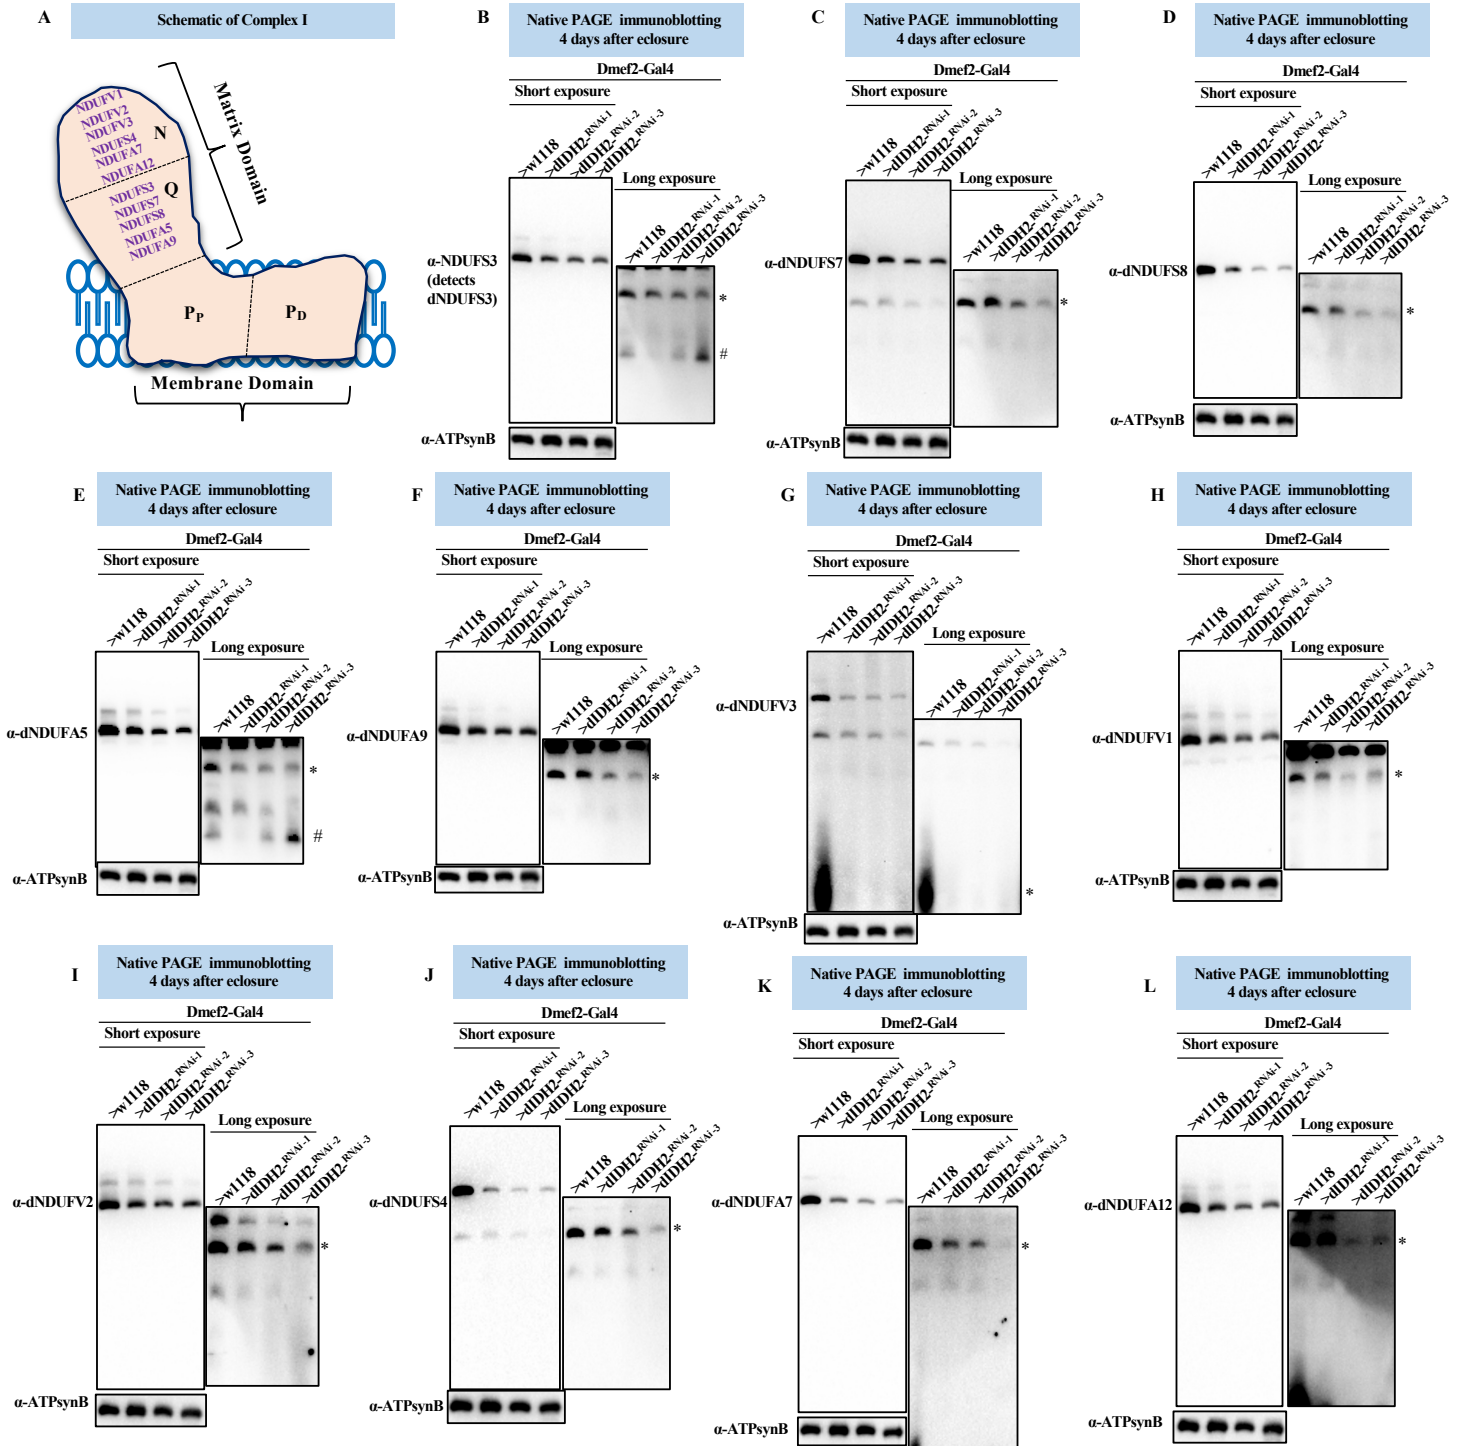

# FIGURE S6

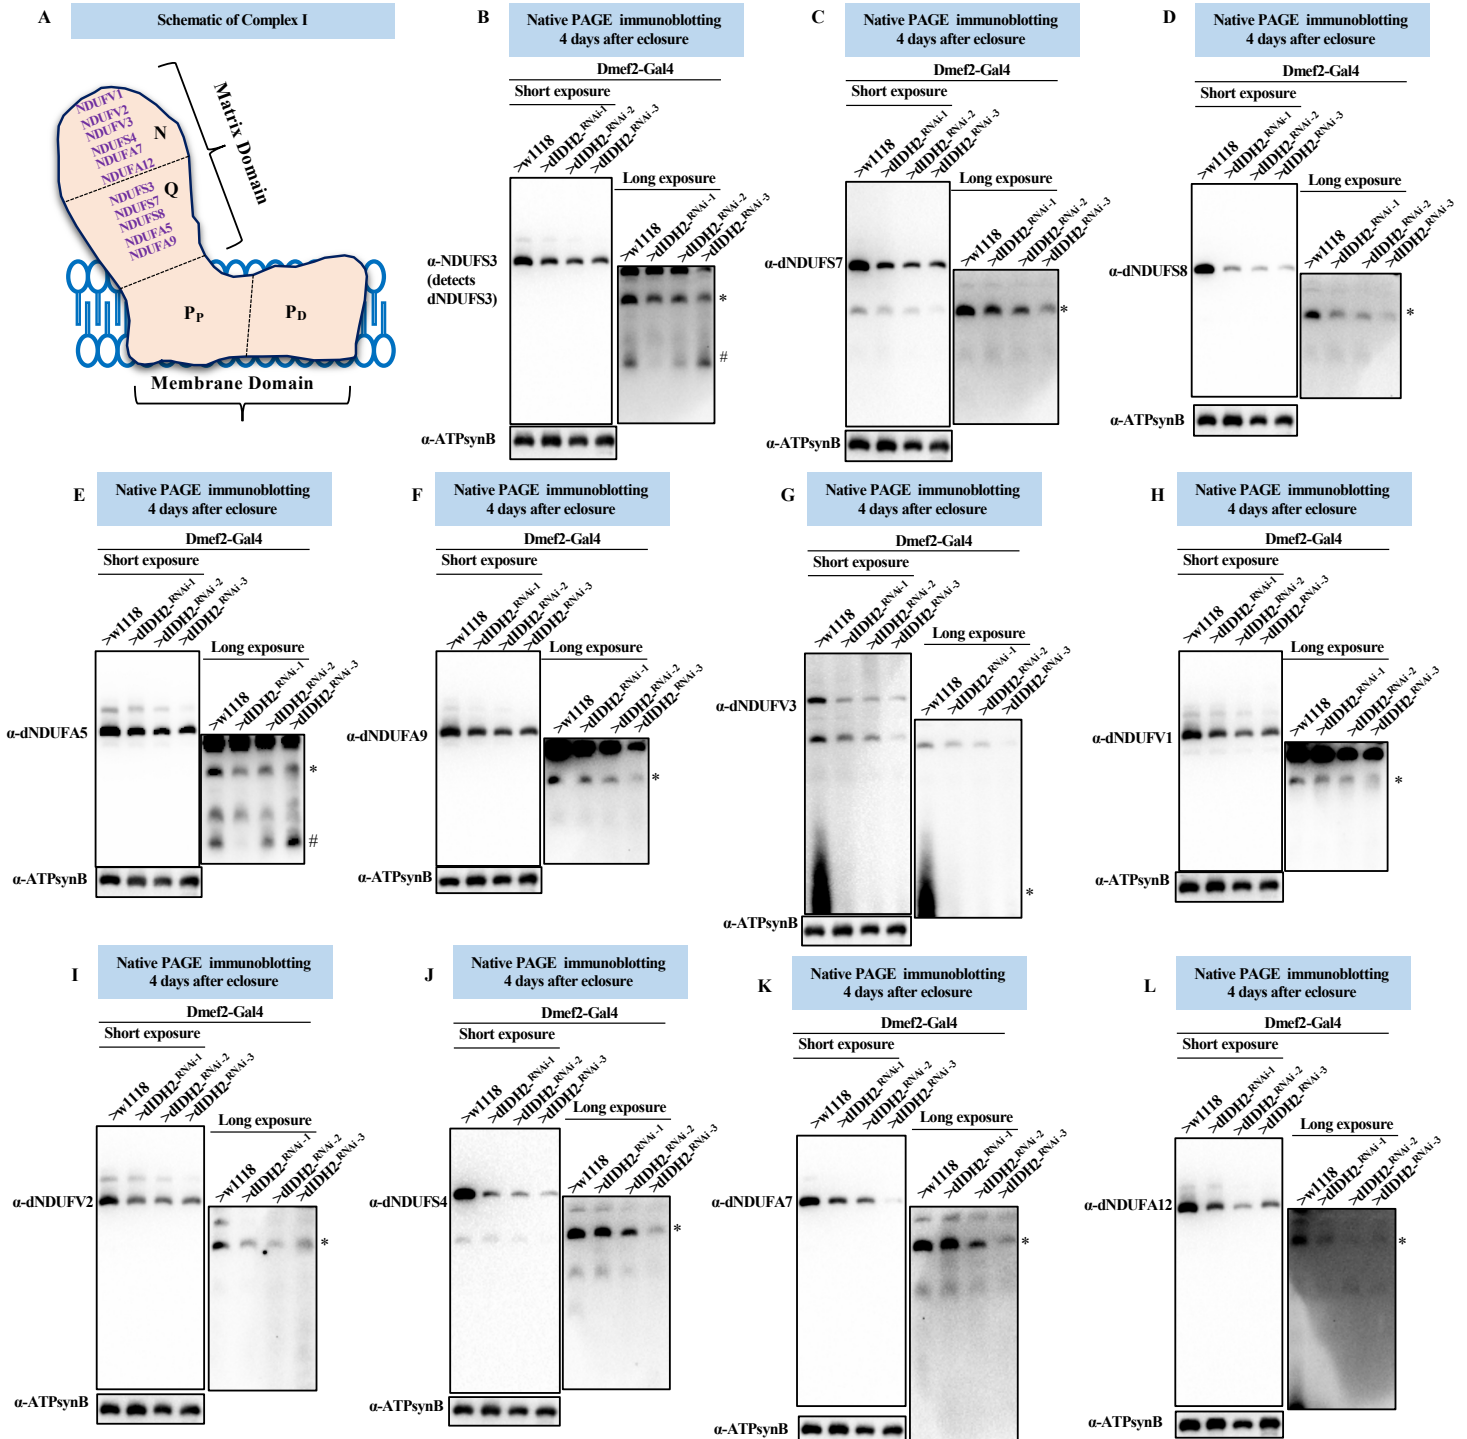

**FIGURE S7**

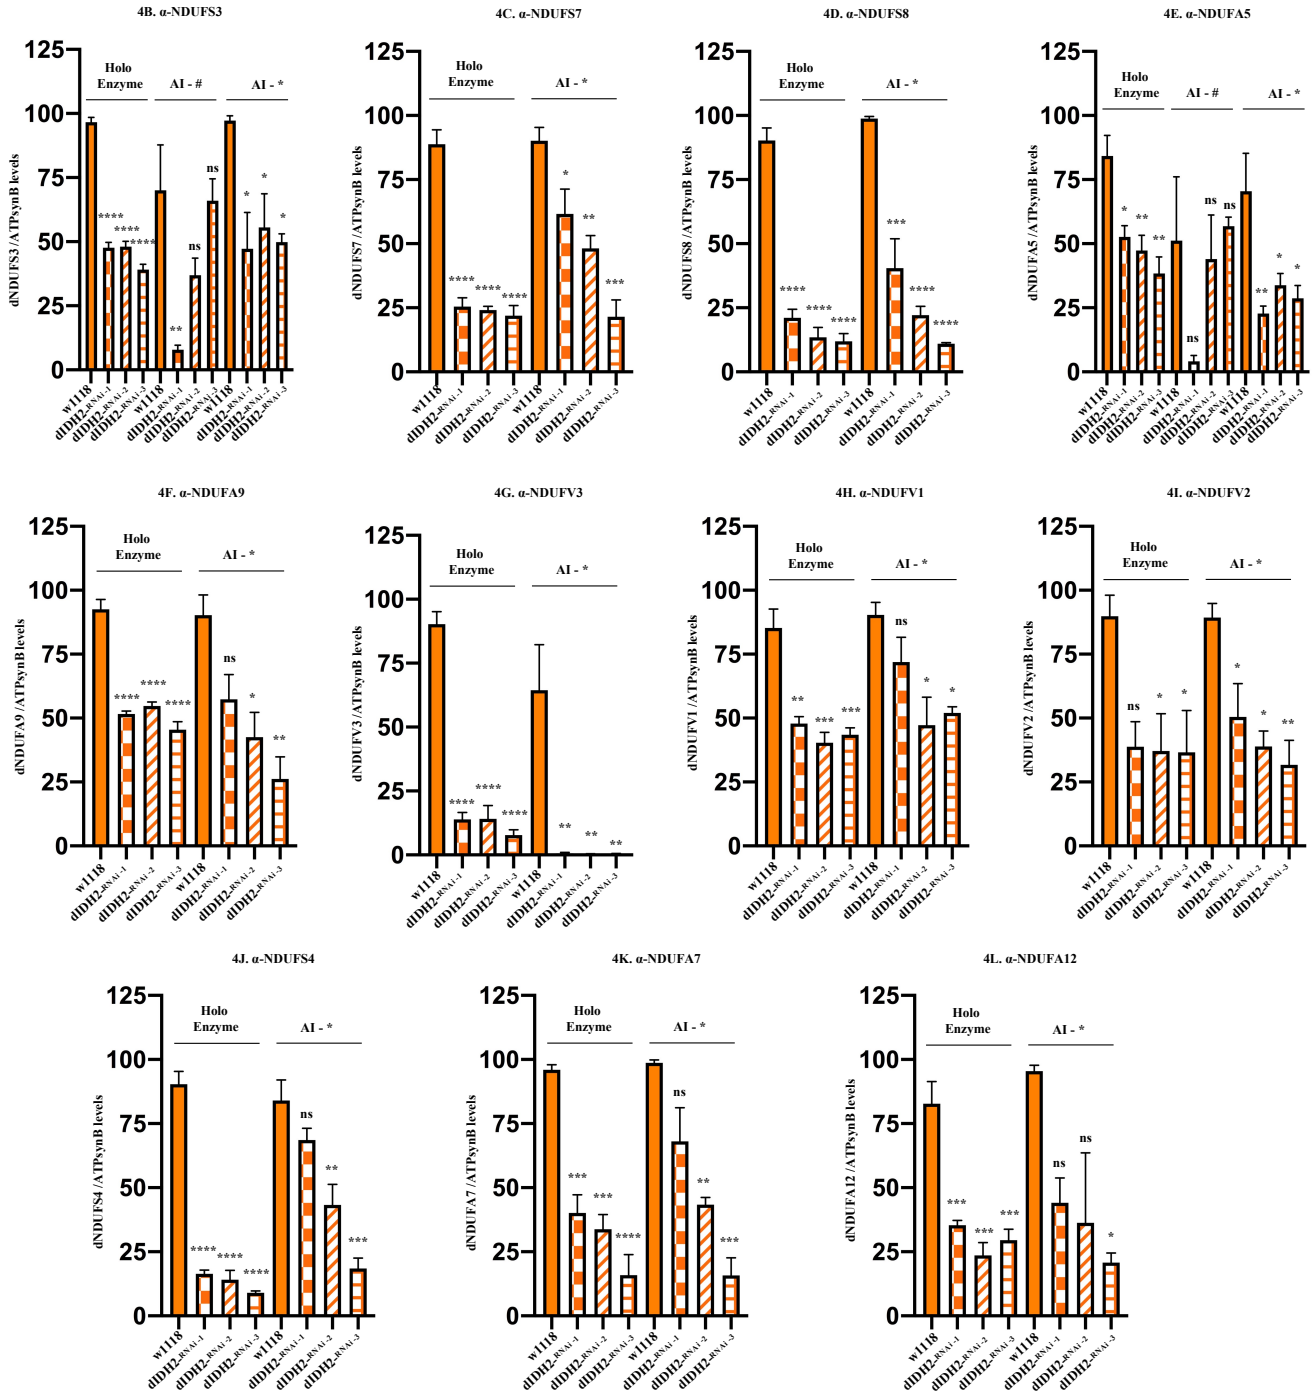

# FIGURE S8

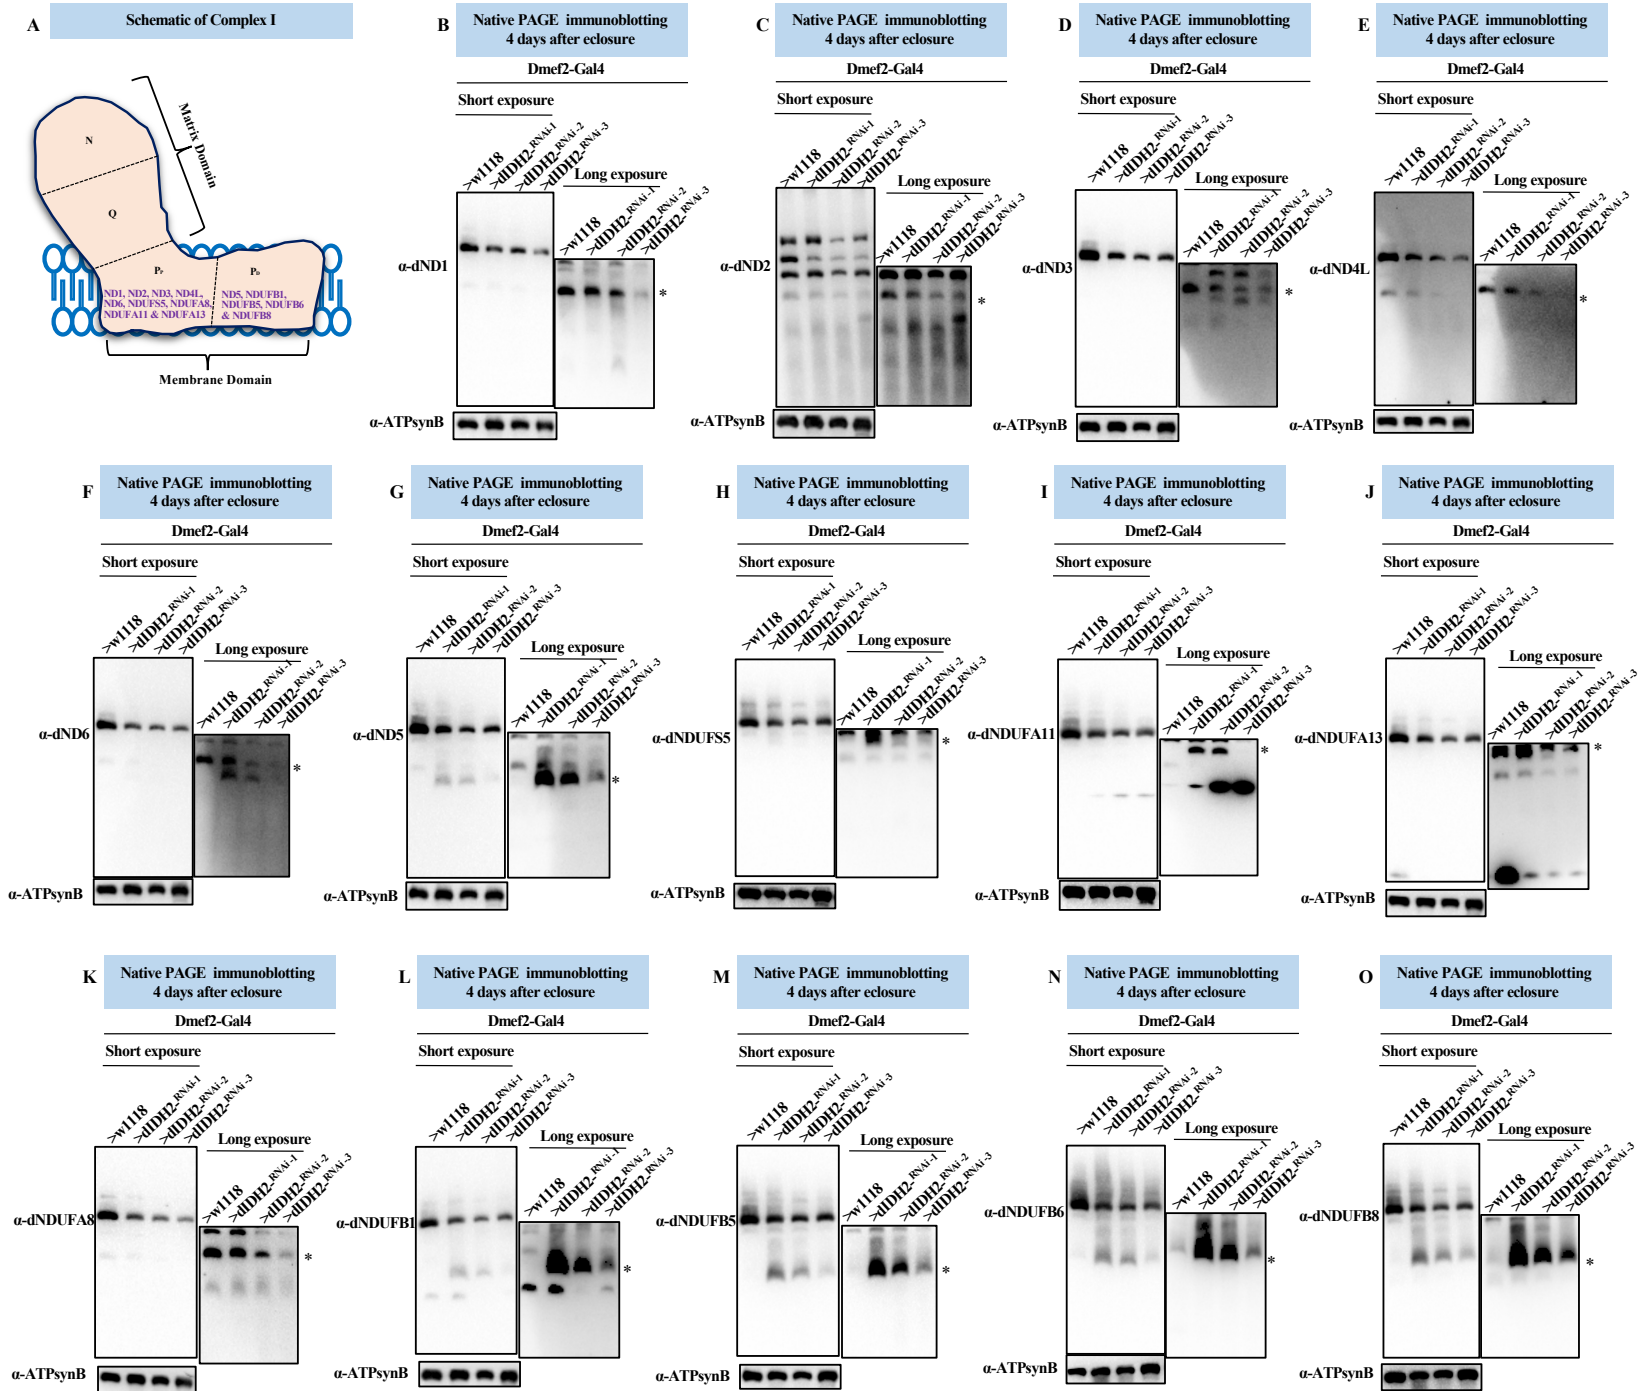

# FIGURE S9

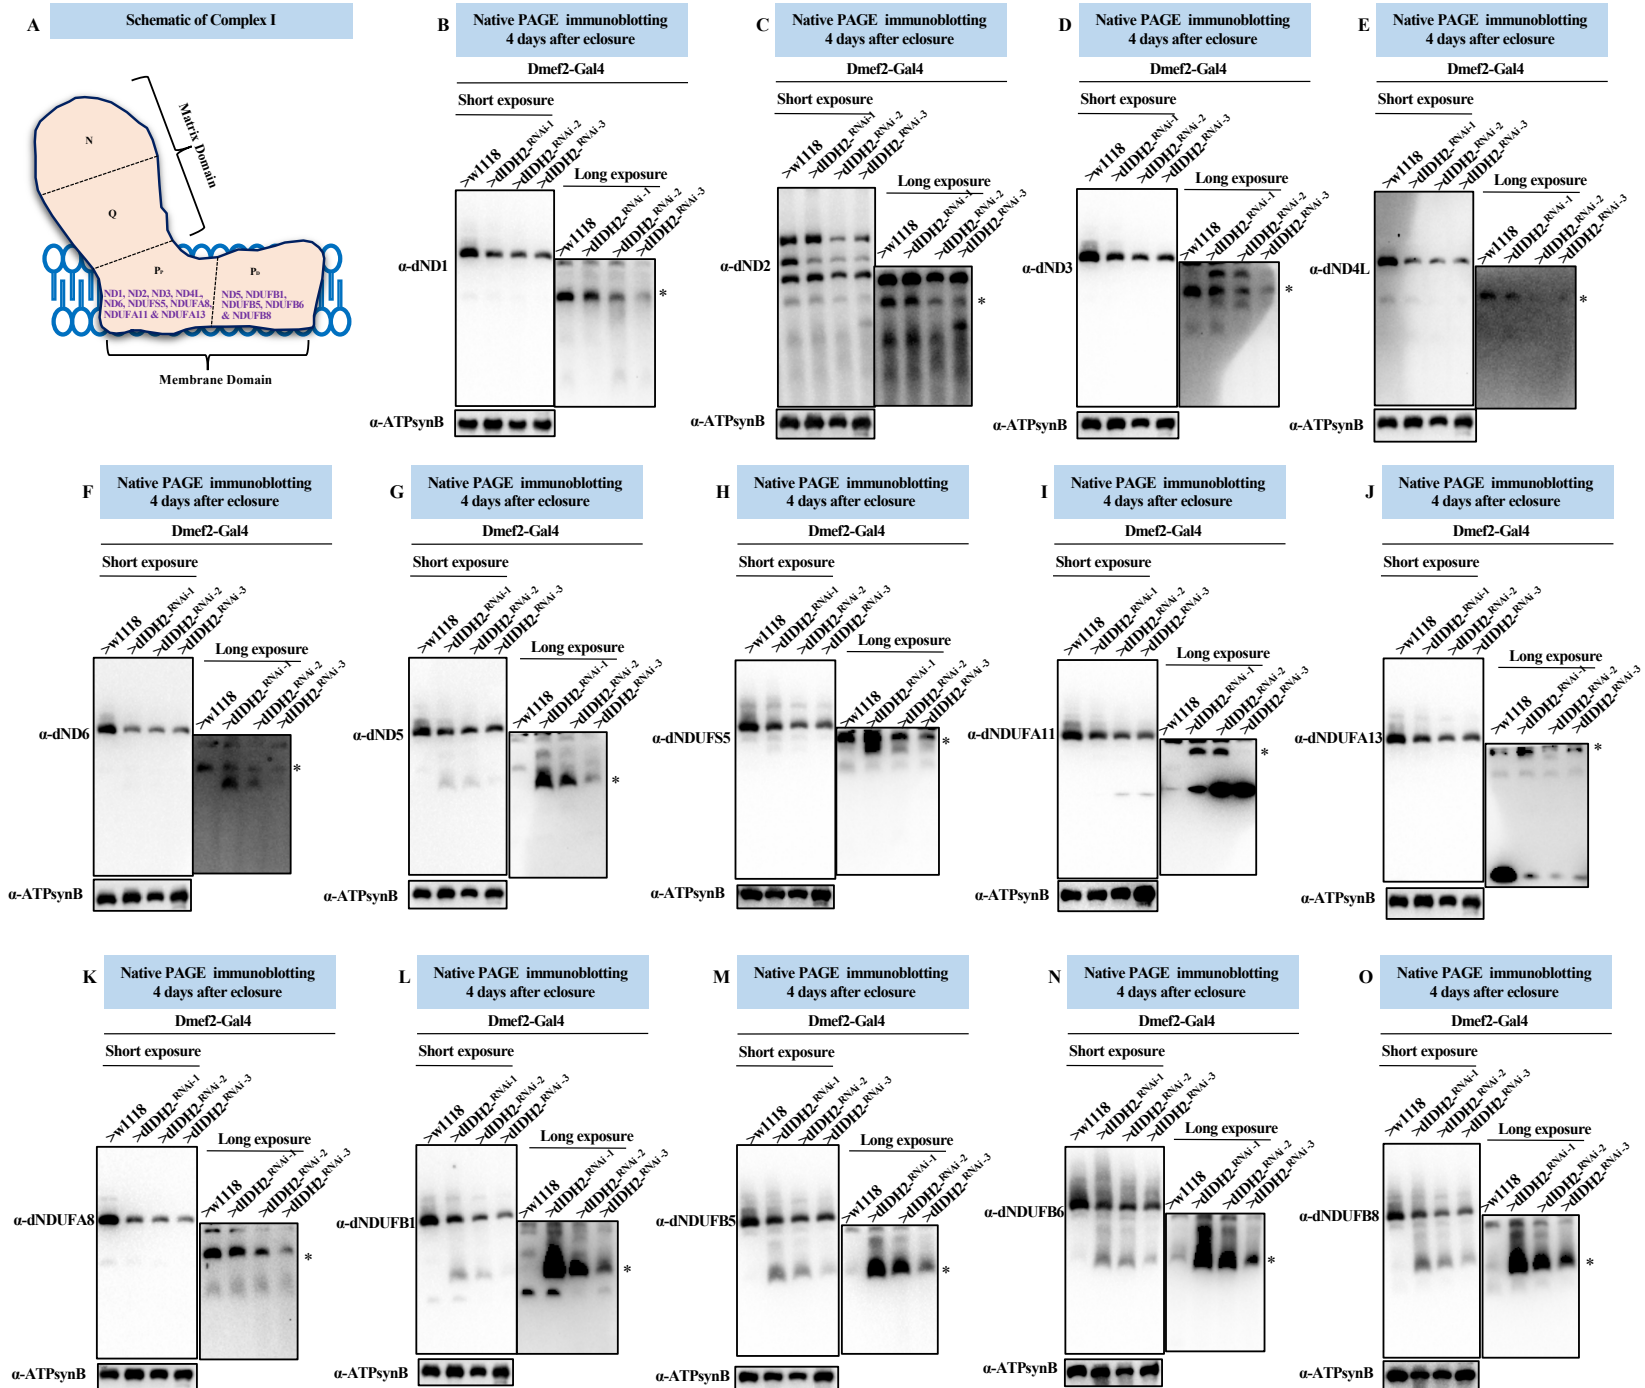

# FIGURE S10

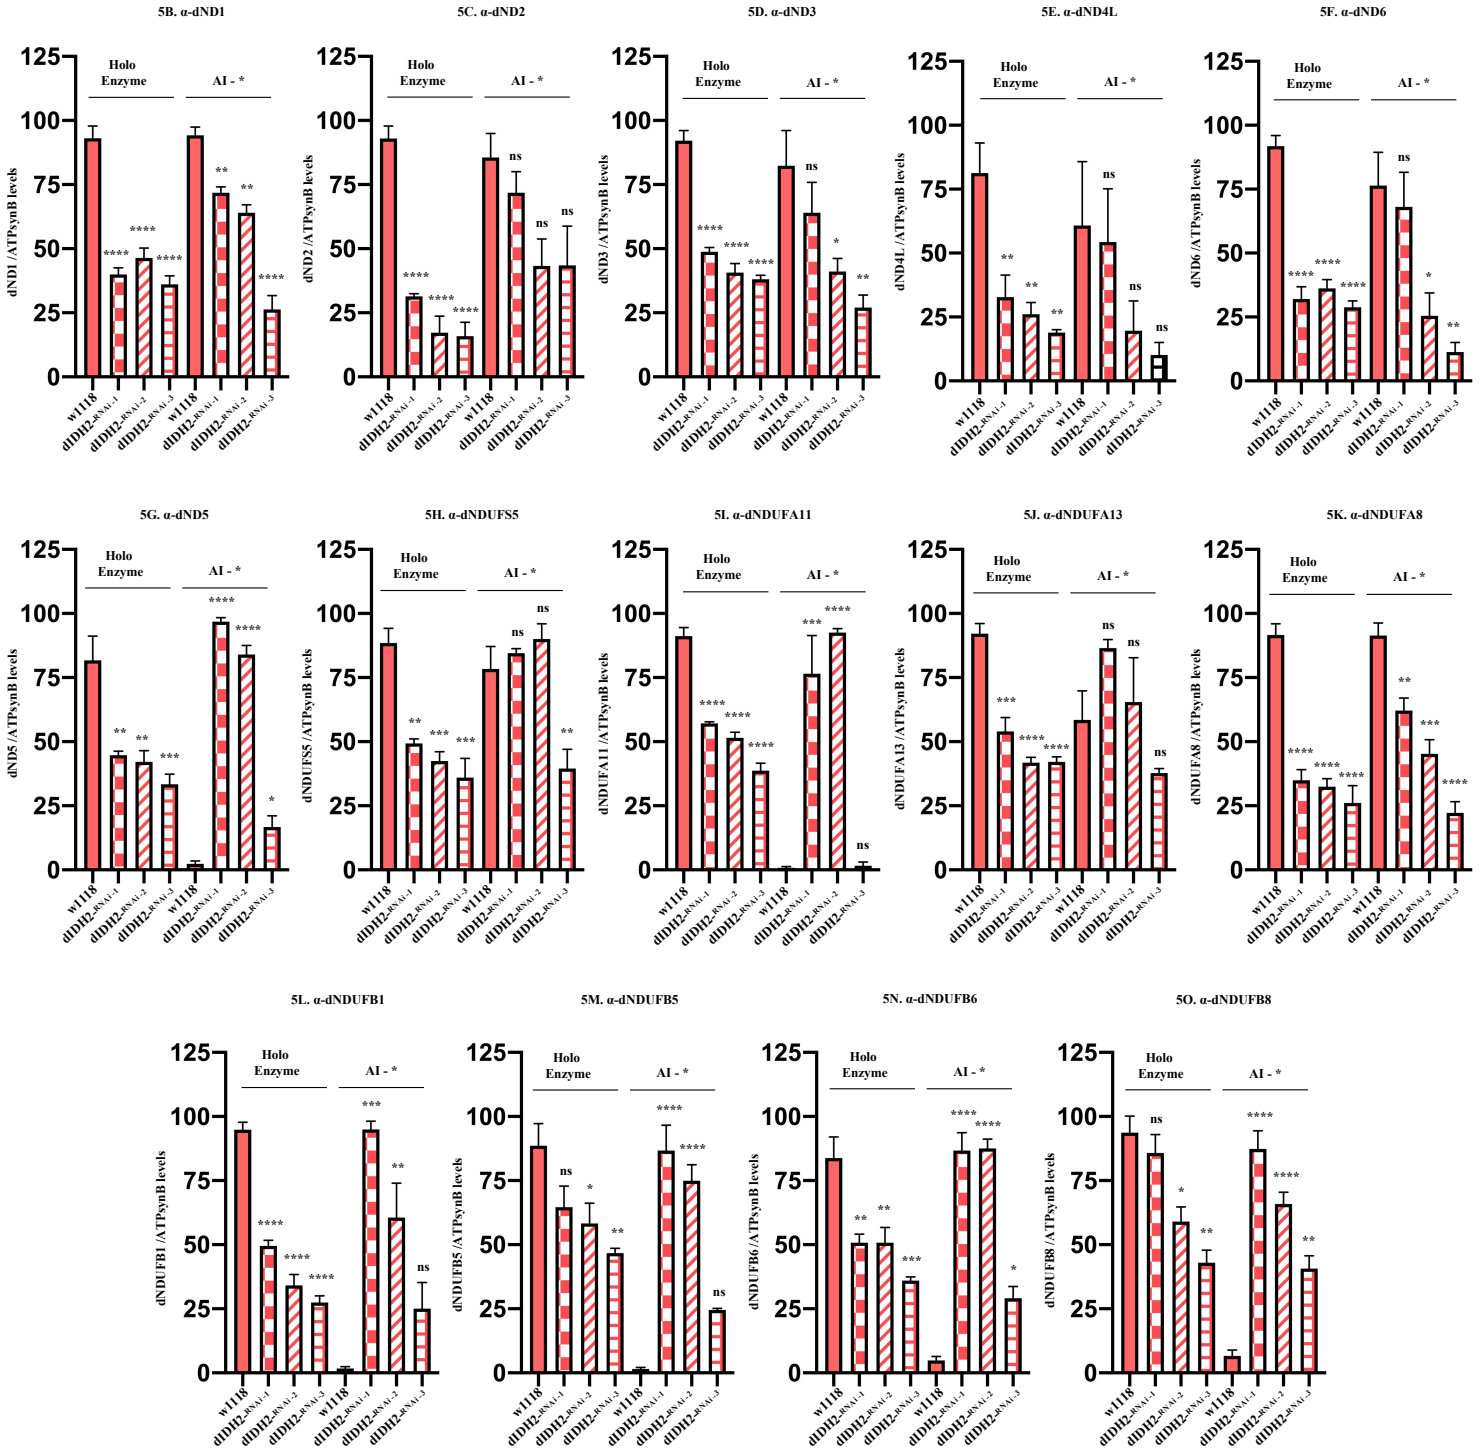

# FIGURE S11

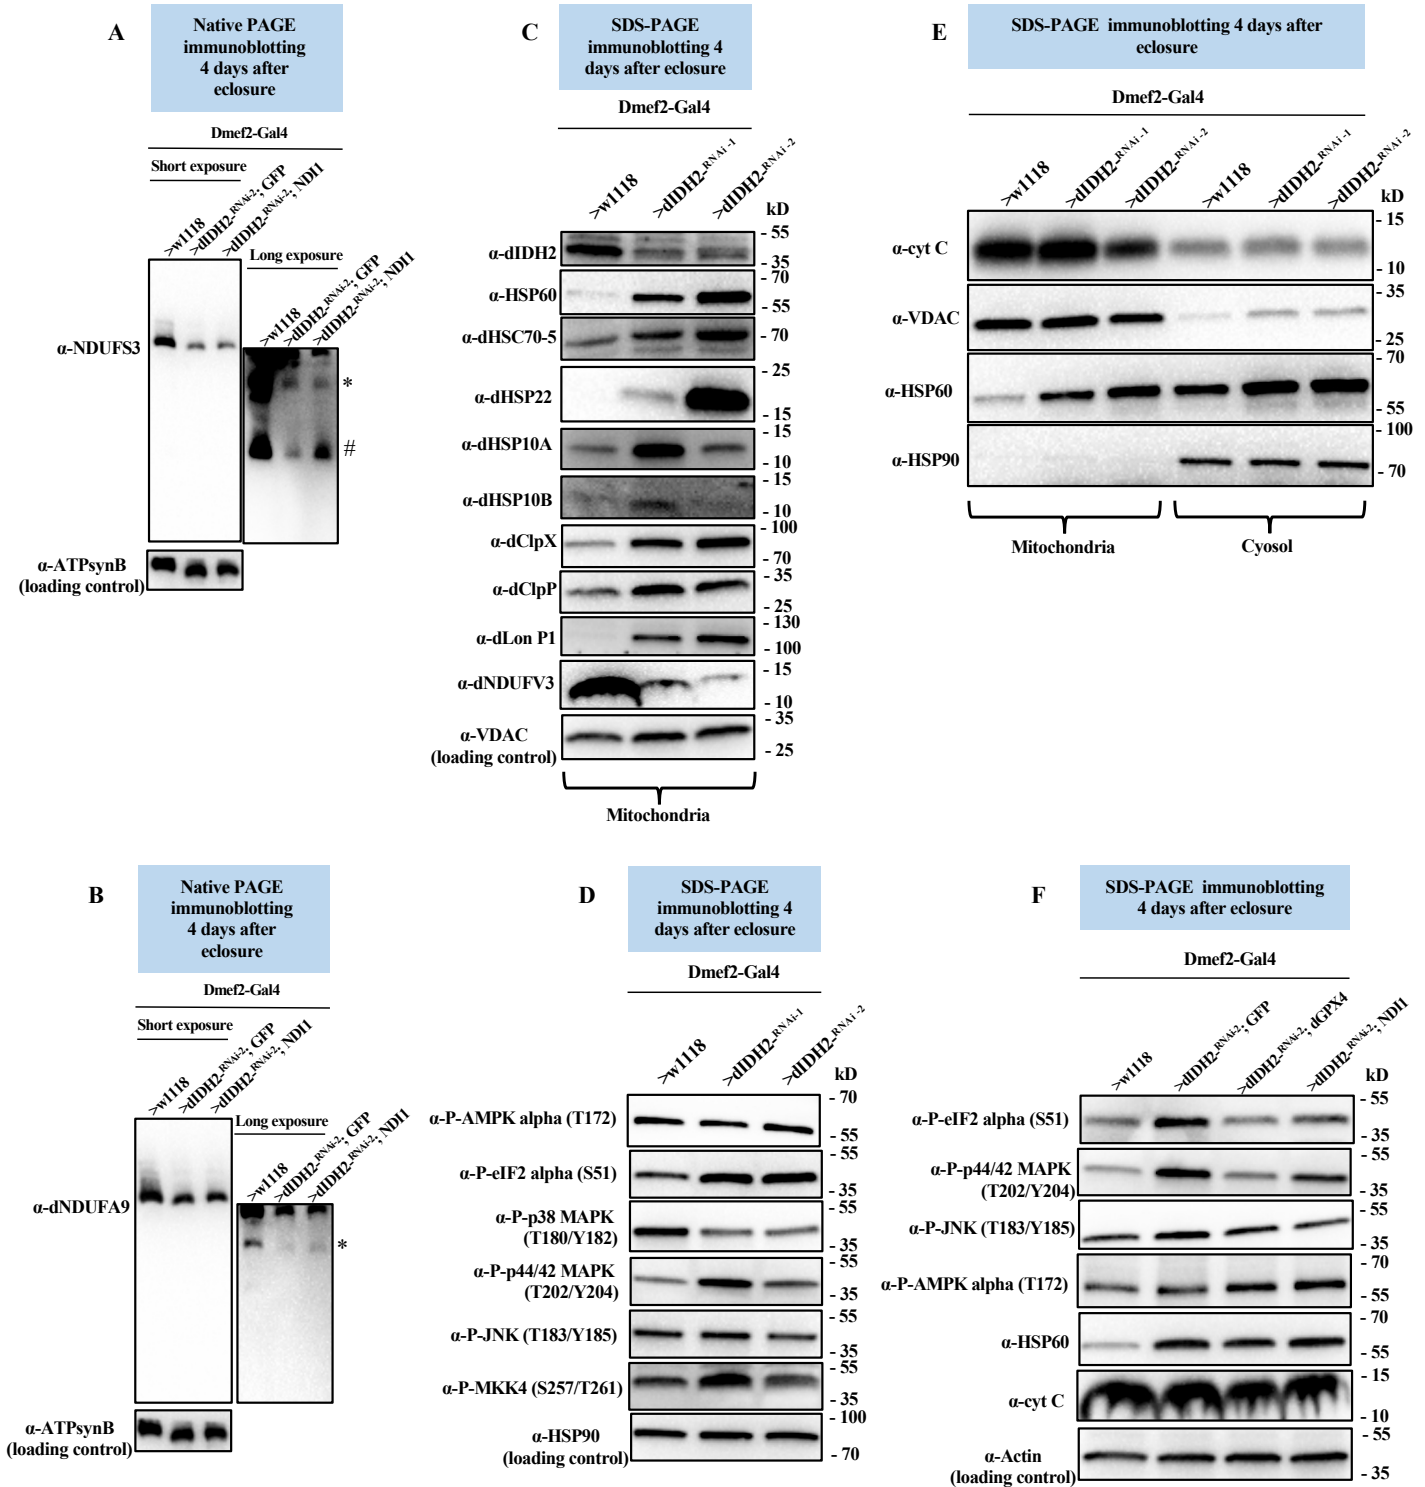



# FIGURE S12

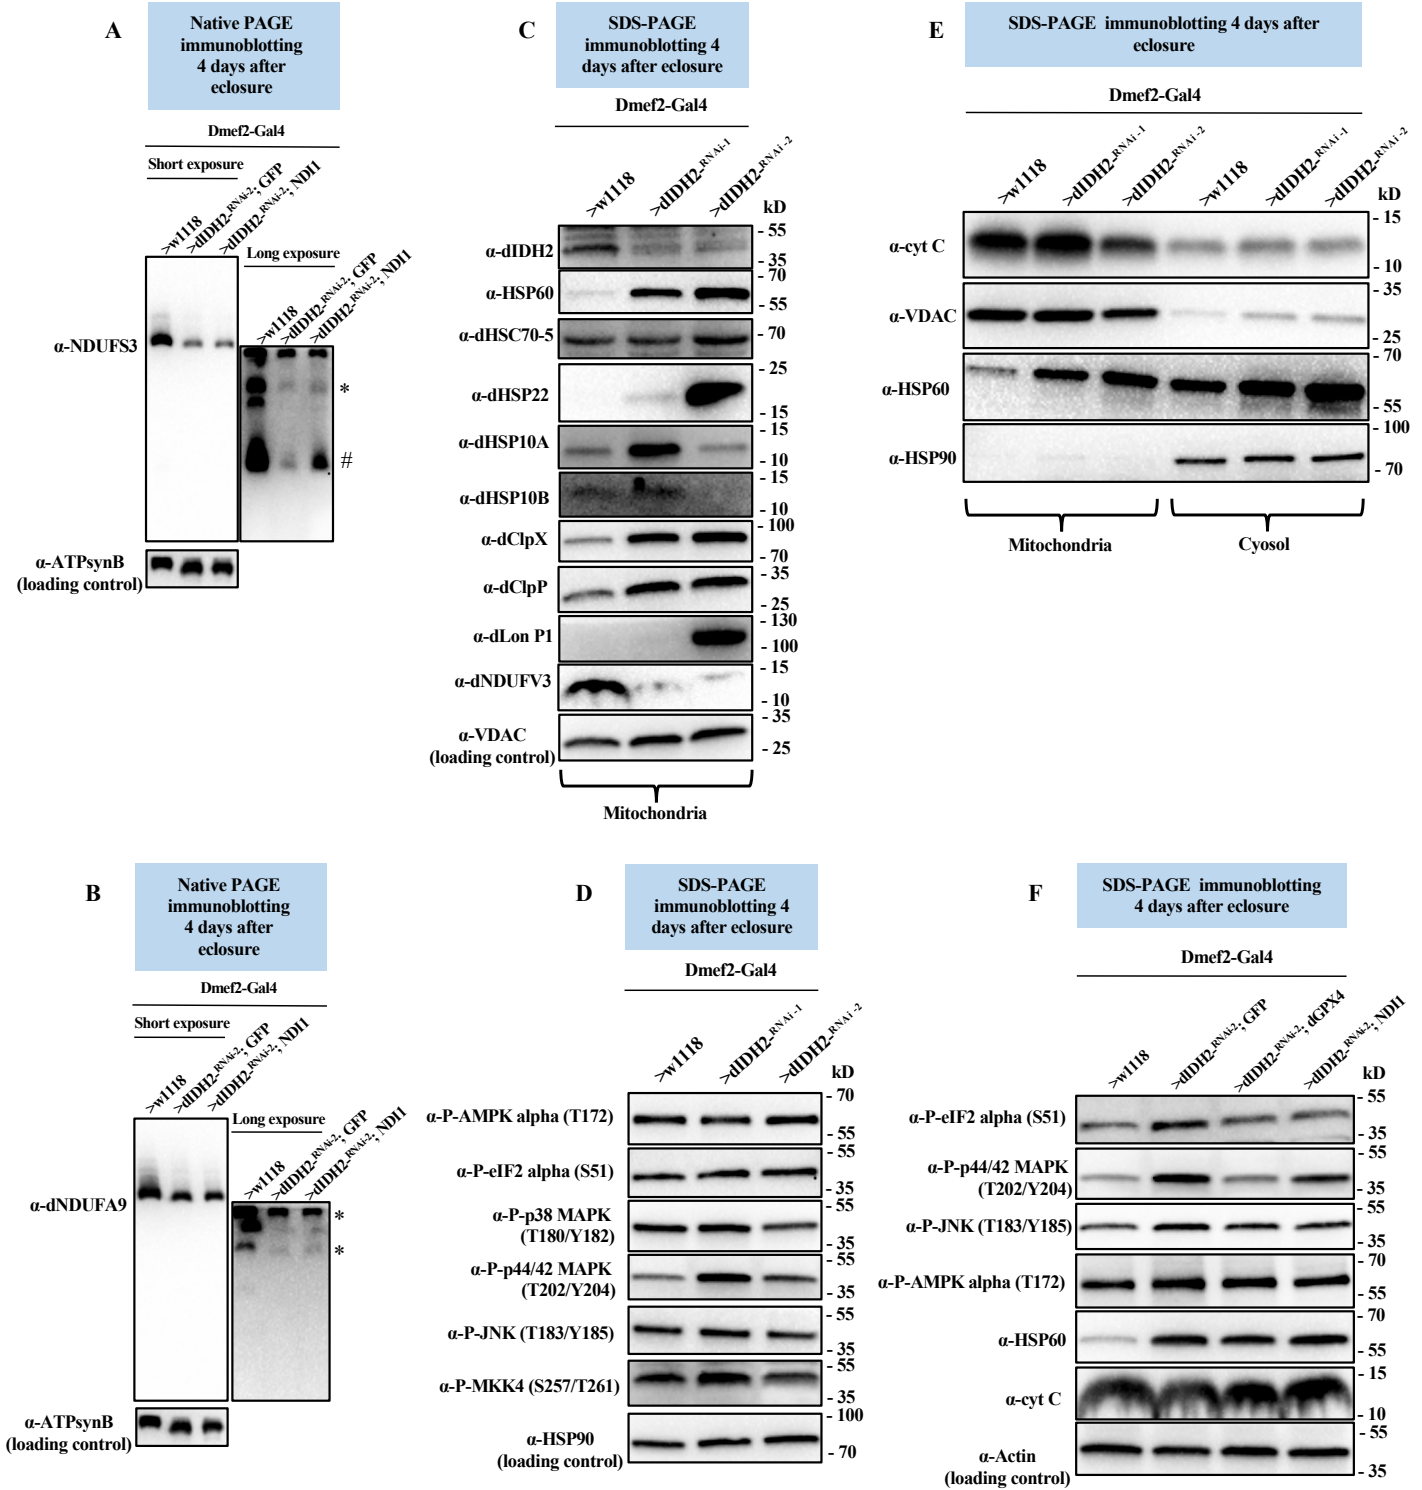

# FIGURE S13

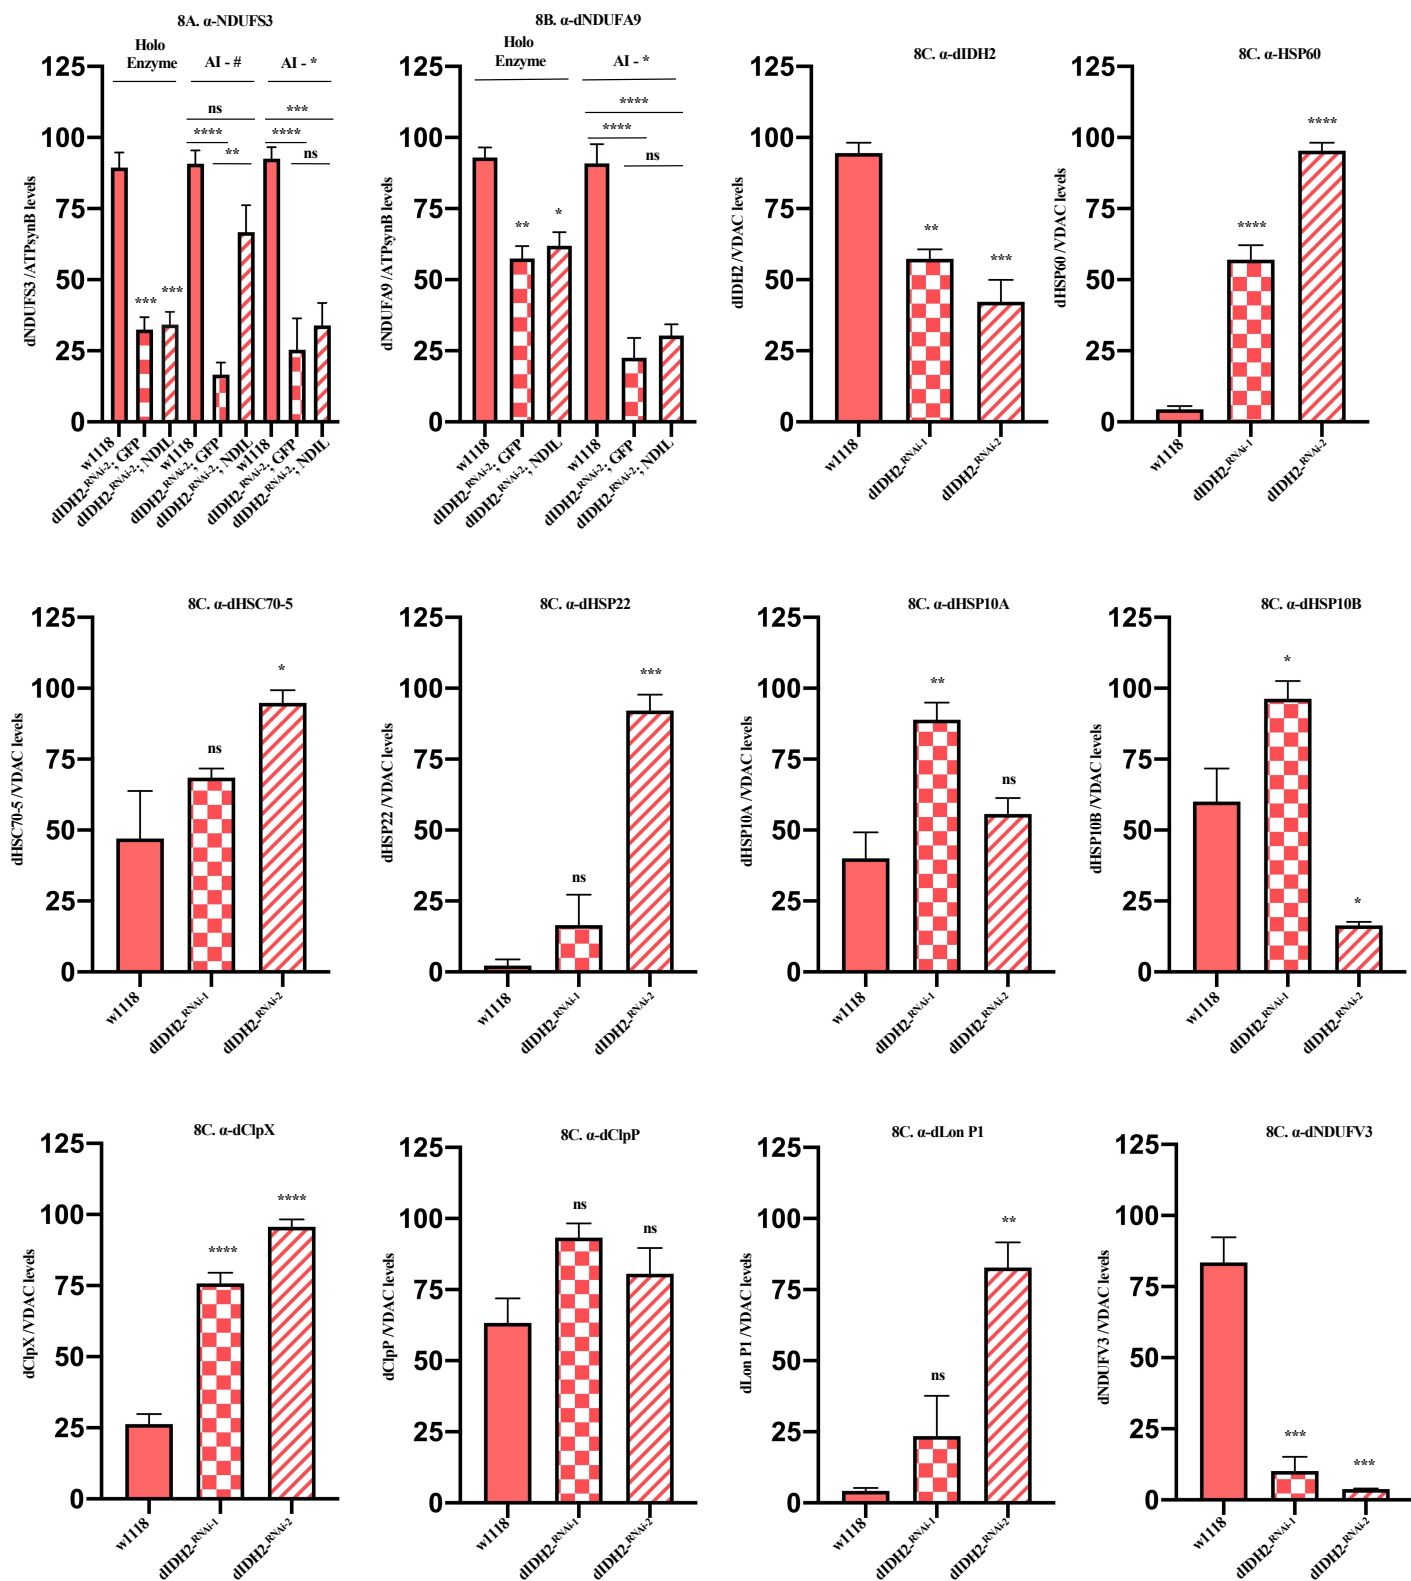

# FIGURE S14

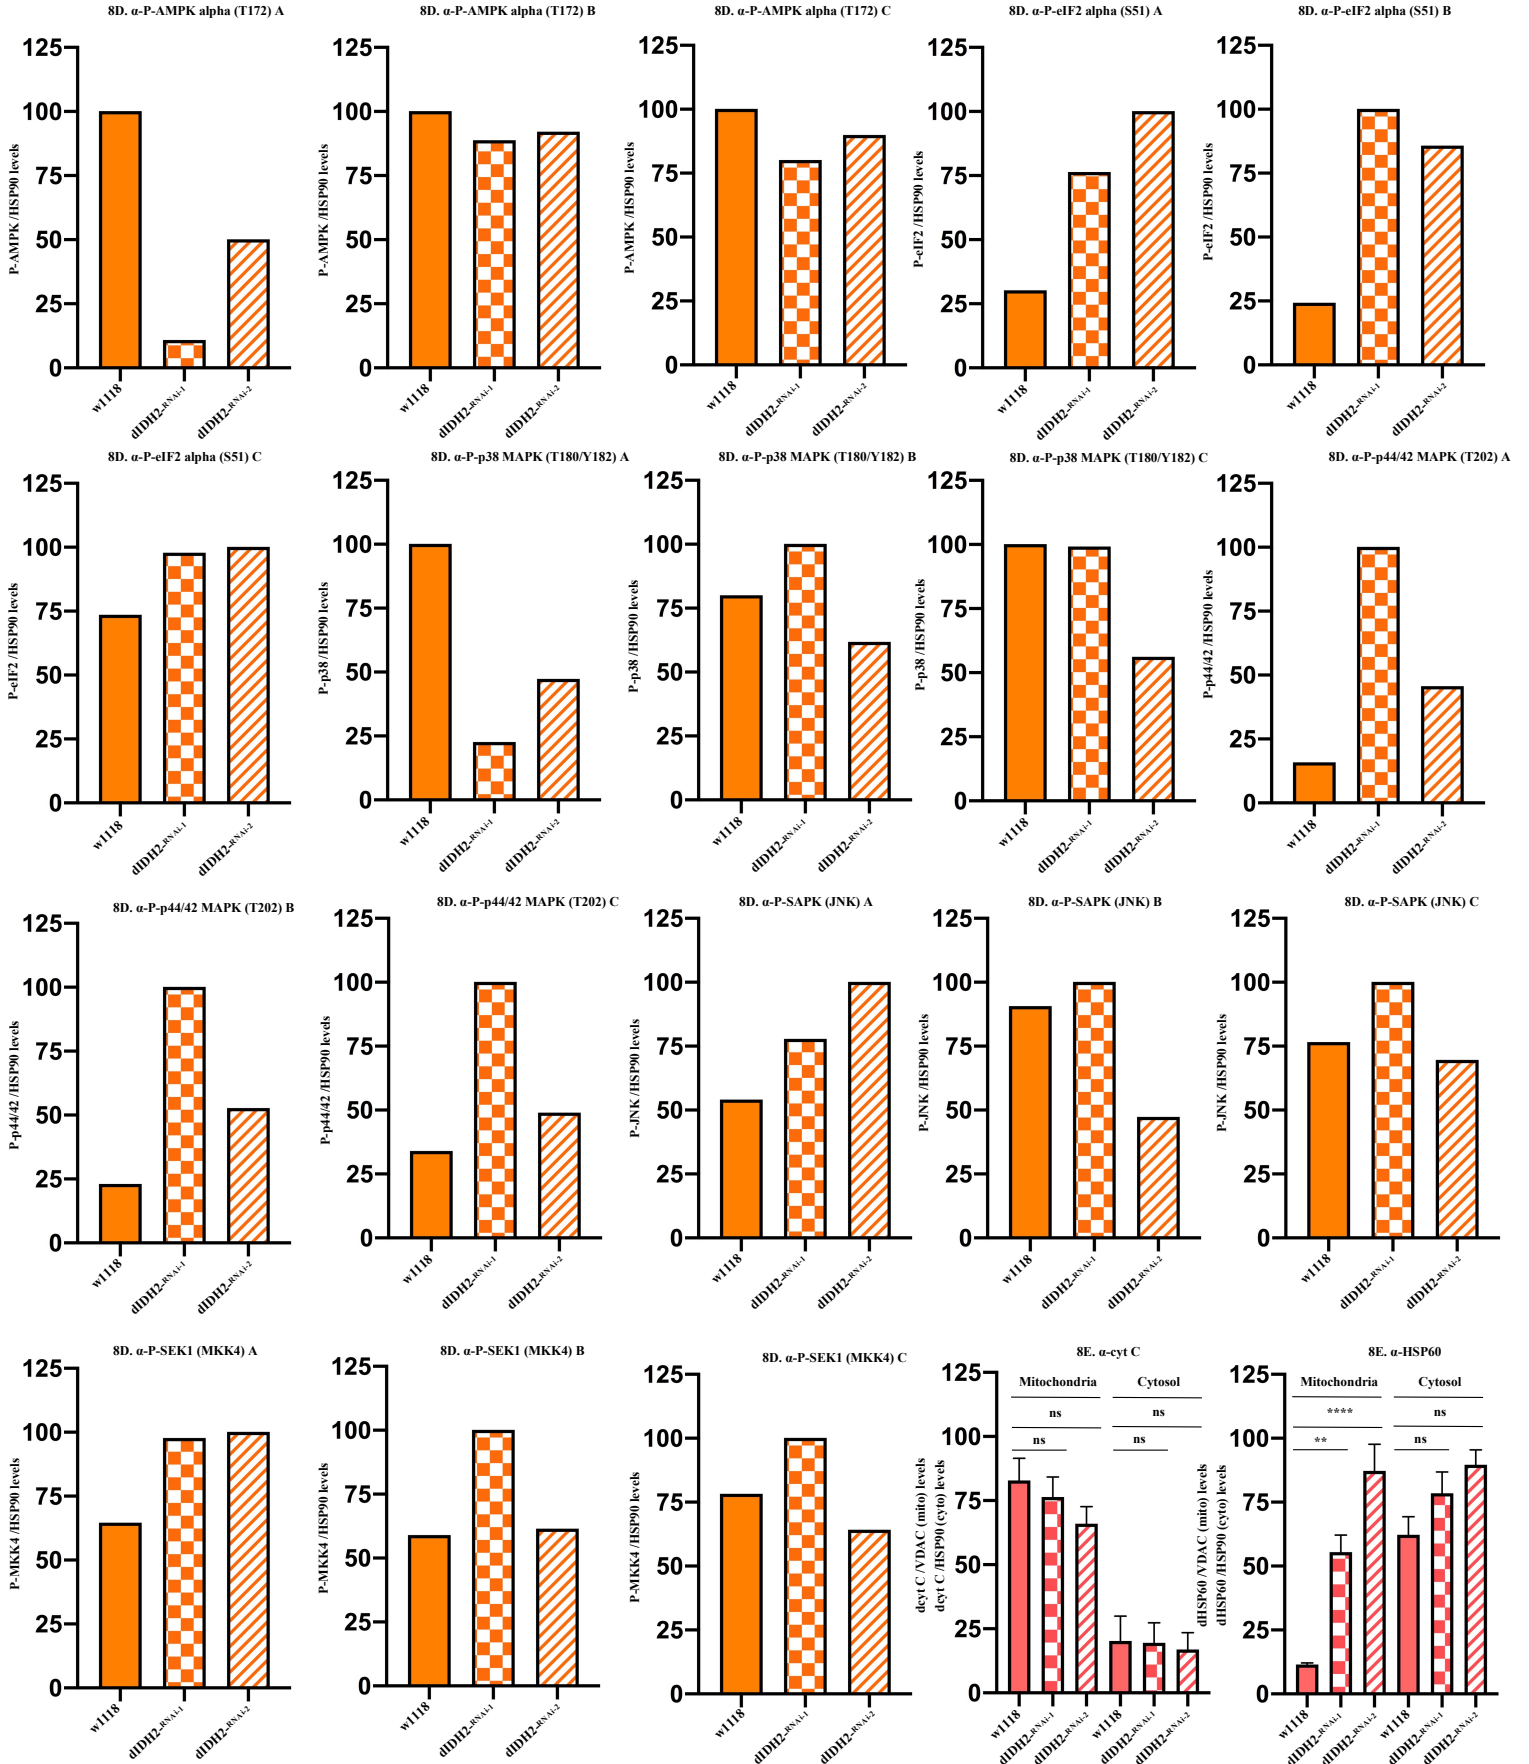

**FIGURE S15**

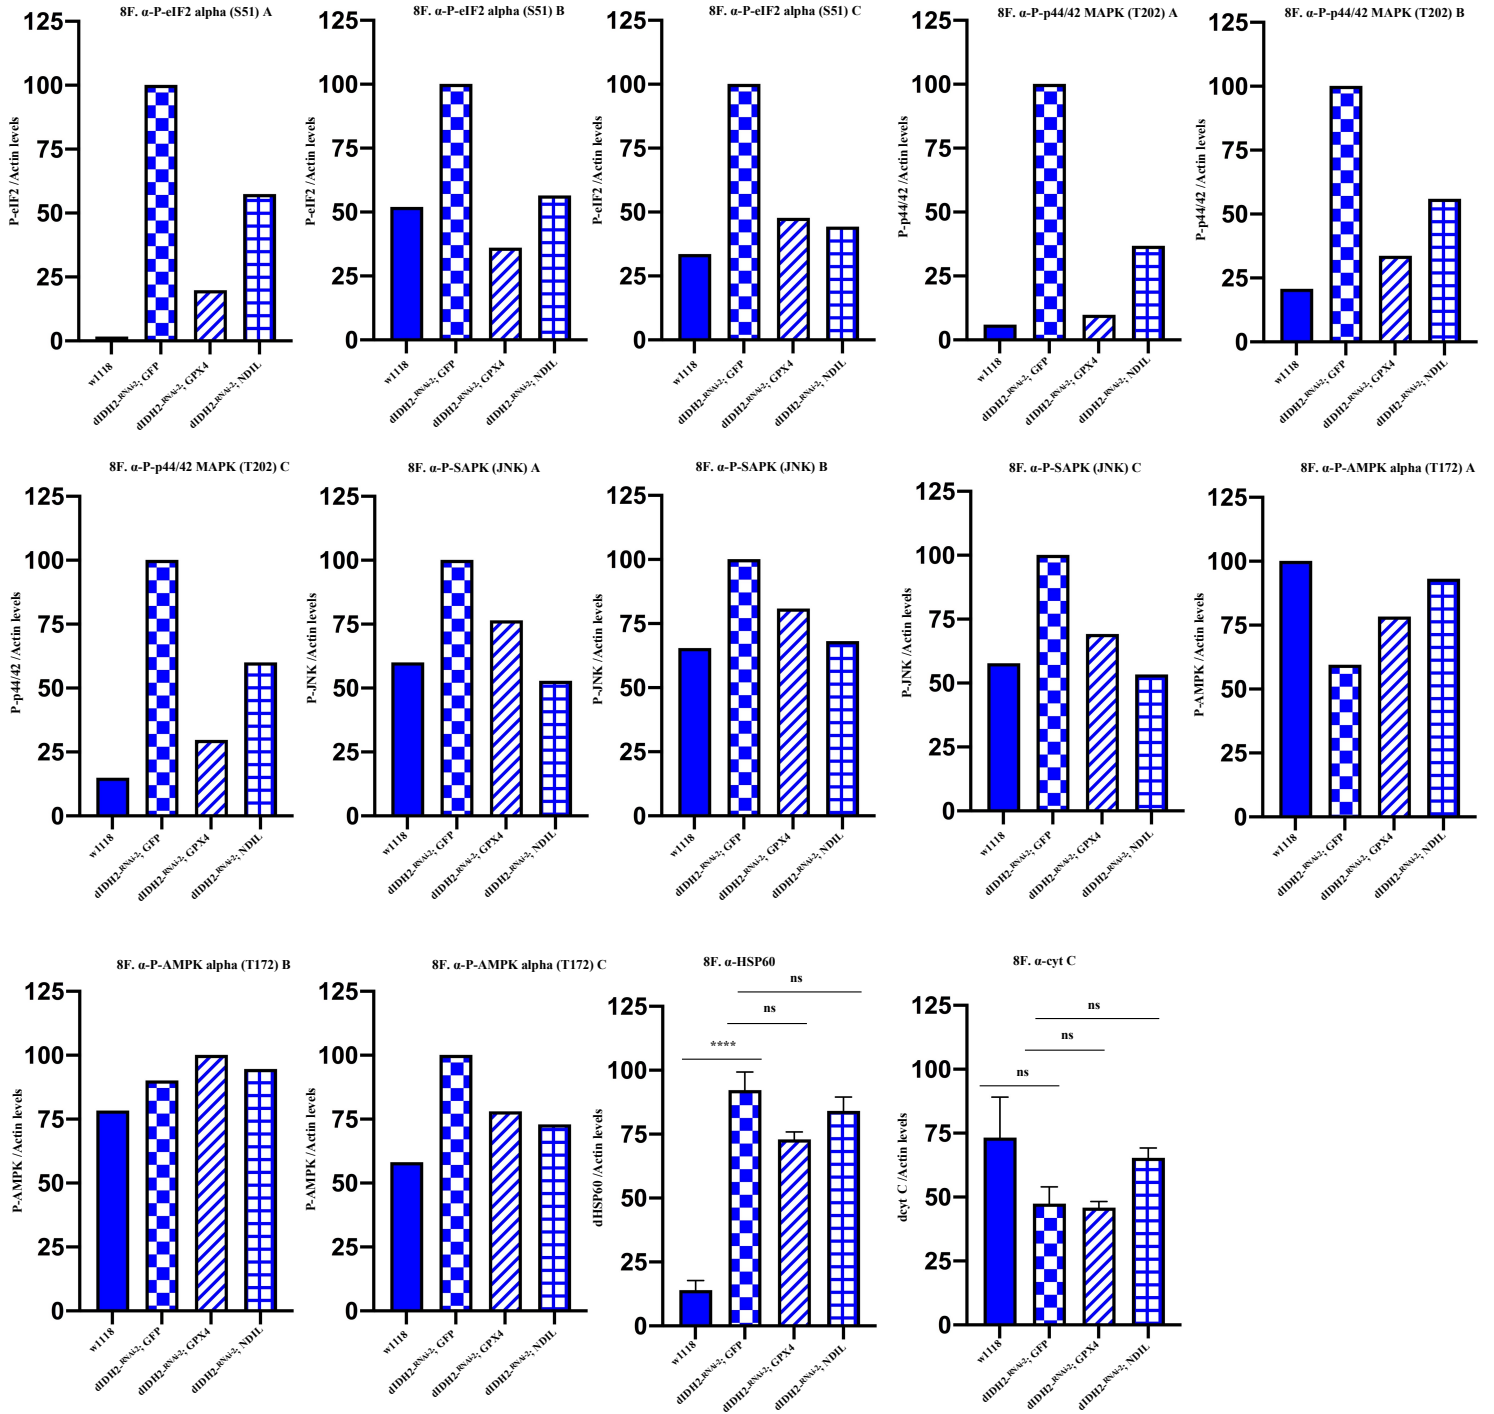

# FIGURE S16

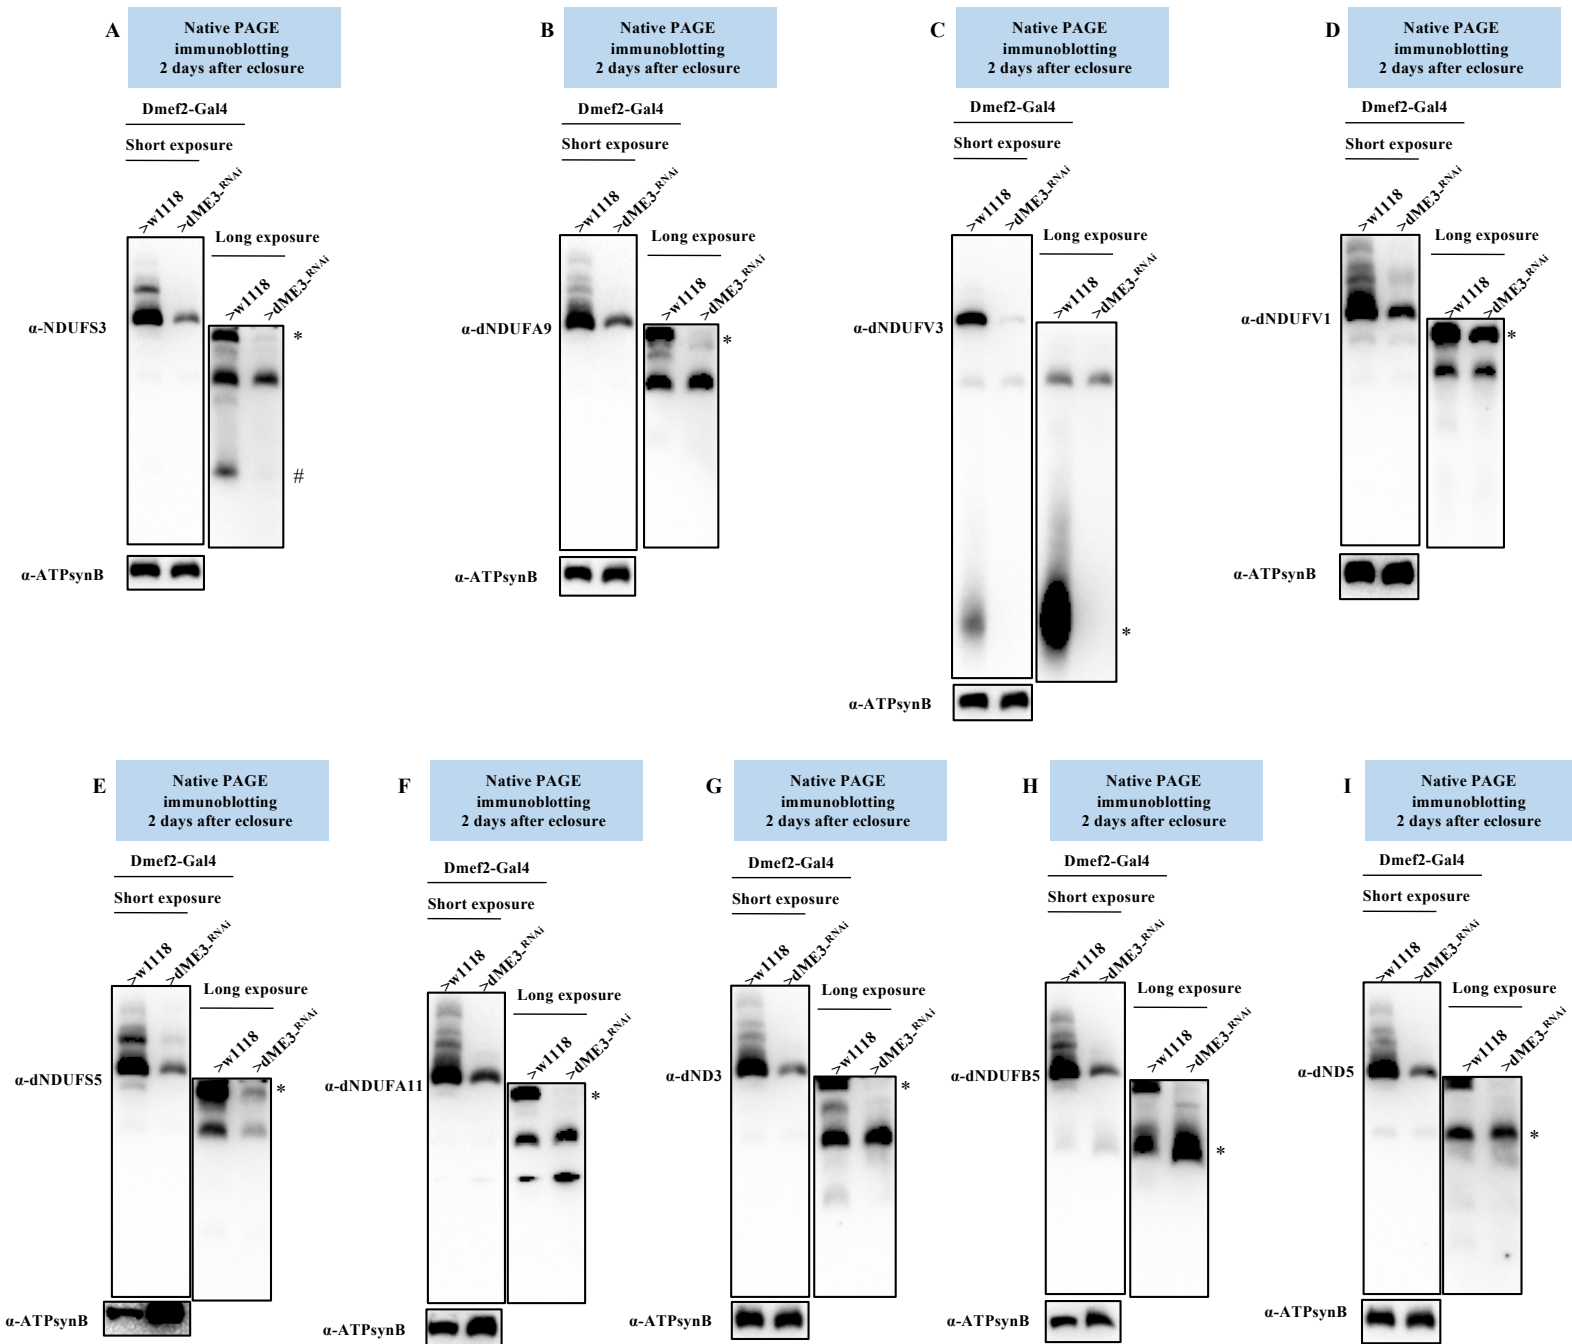

# FIGURE S17

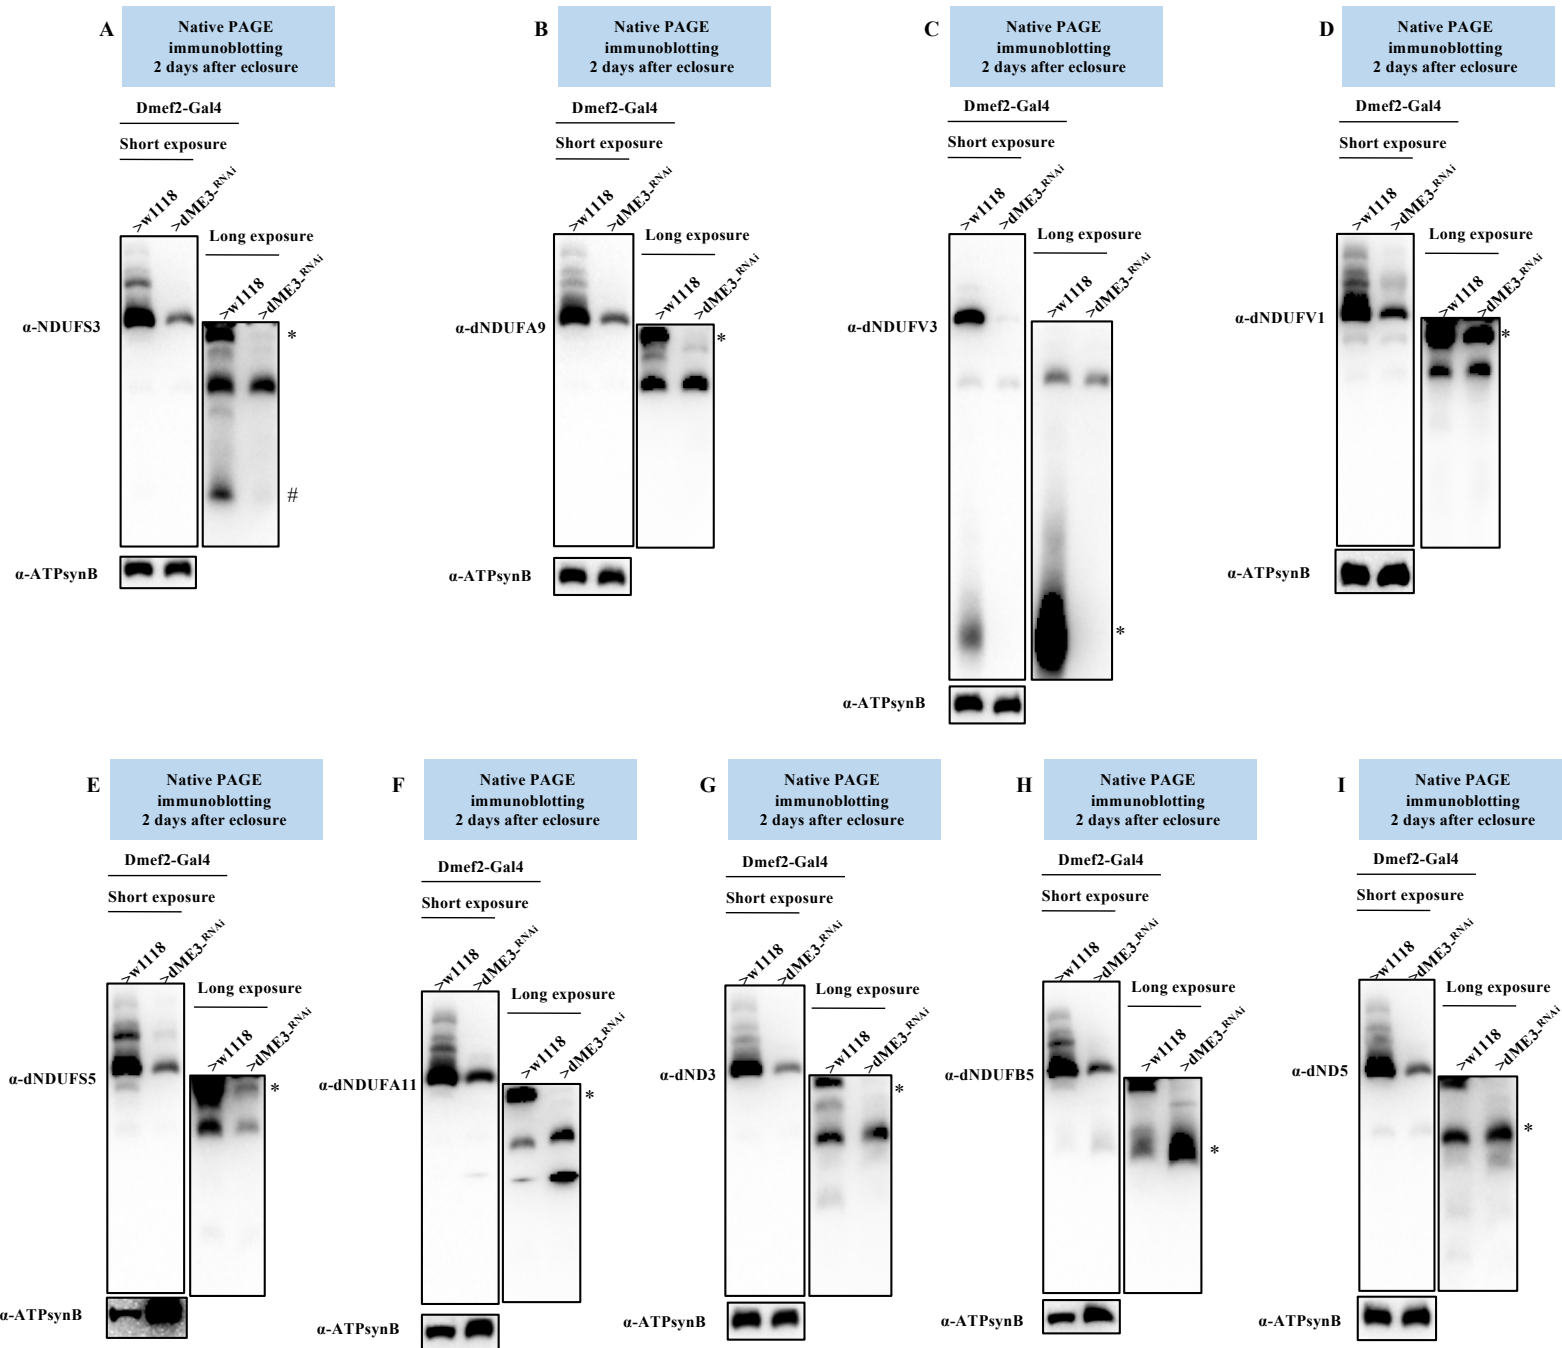

# FIGURE S18

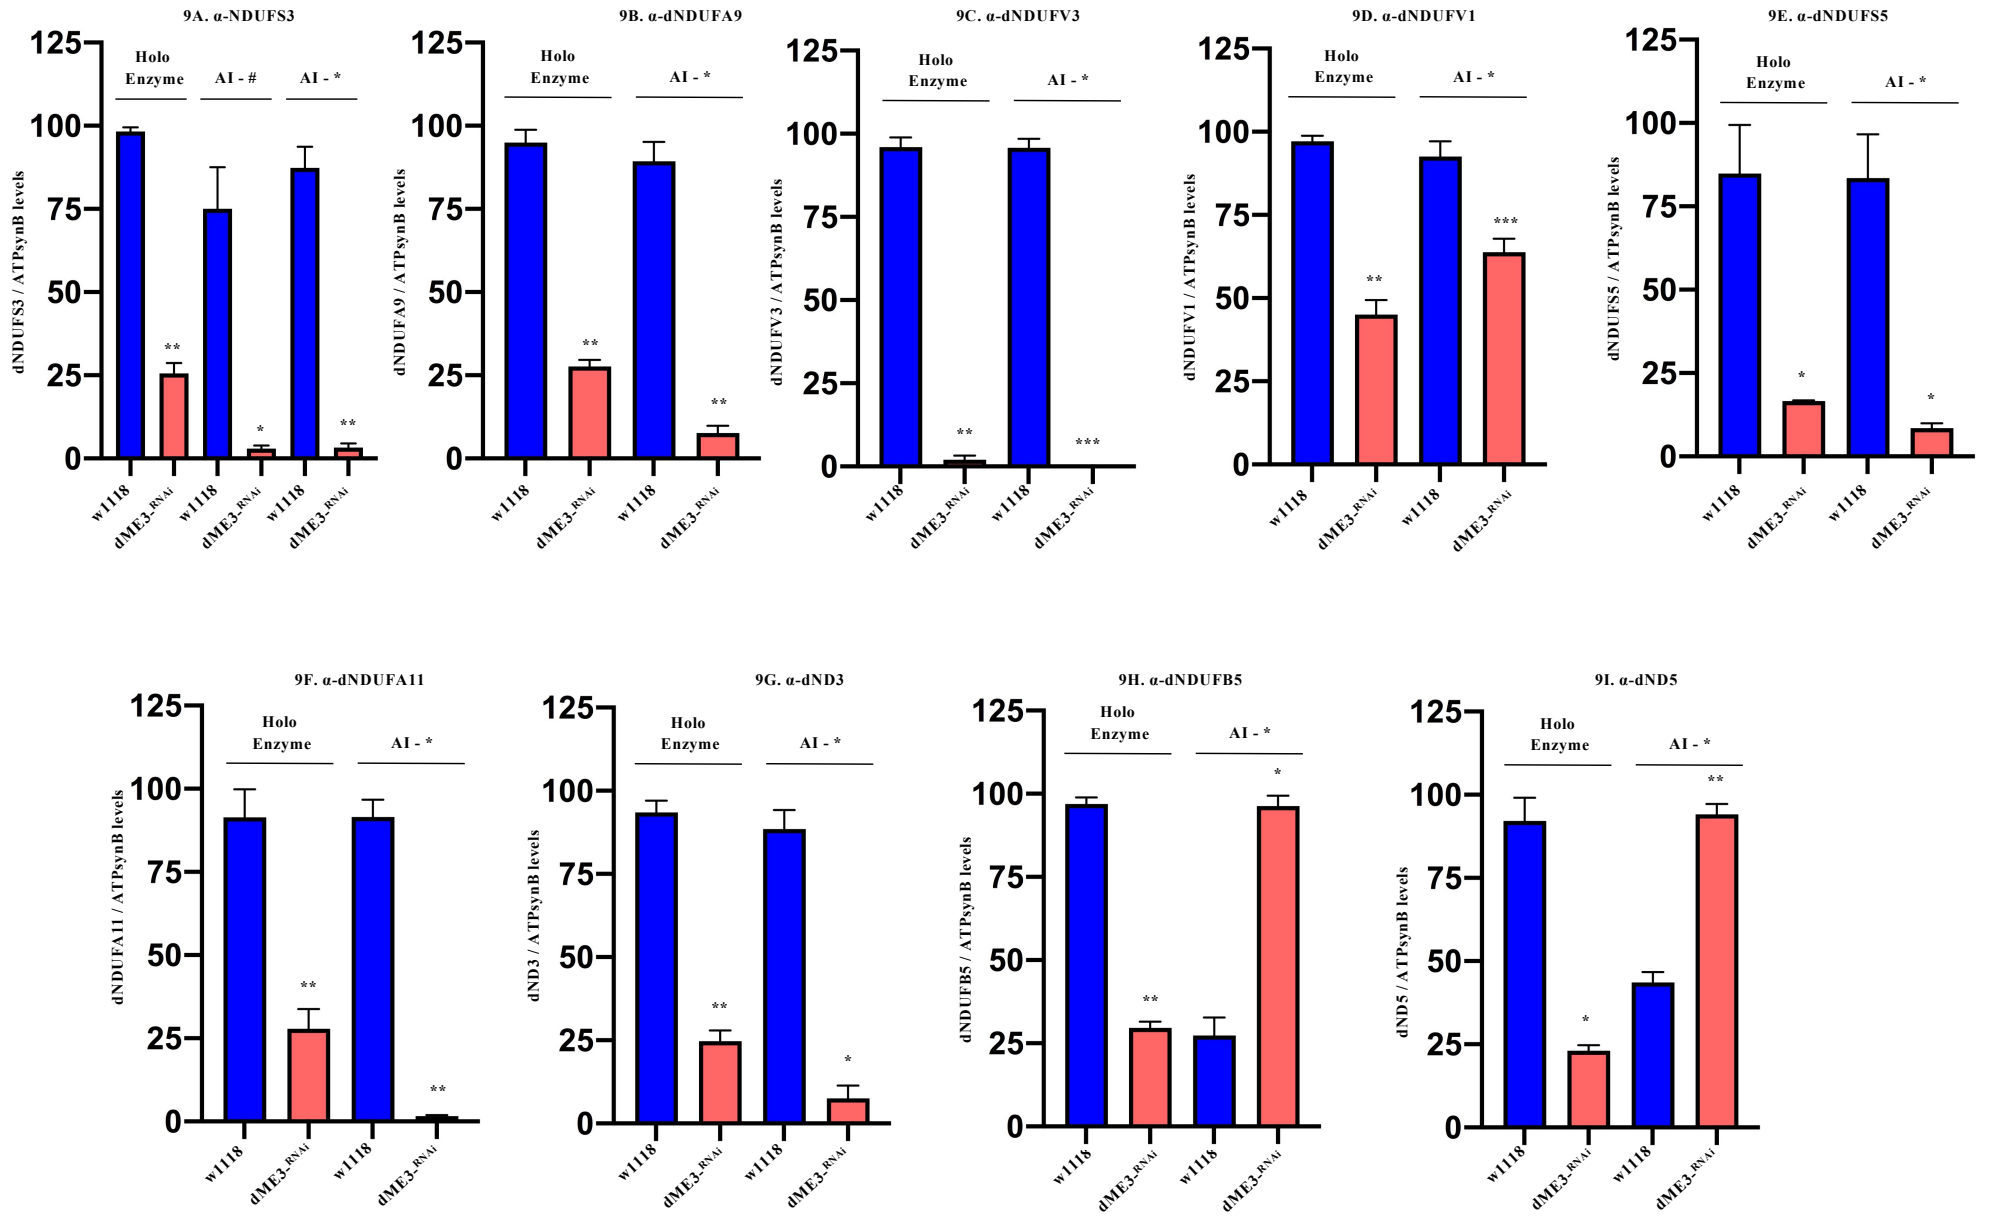

Supplement: sciadv.abl8716_sm.pdf [file sciadv.abl8716_sm.pdf]
